# Supplementary material for: A divergent cyclin/cyclin-dependent kinase complex controls the atypical replication of a malaria parasite during gametogony and transmission
Source: eLife. 2020 Jun 22;9:e56474. doi: 10.7554/eLife.56474 (PMC7308089; doi:10.7554/eLife.56474)
Supplement: Supplementary file 4. [file elife-56474-supp4.xlsx]

## Sheet: Sheet1
Gene ID	Name	Description	SOC2-HA 1min	SOC2-HA 0 sec	SOC2-HA 15 sec	SOC2-HA 30 sec	SOC2-HA 60 sec	SOC2-HA 60 sec +1294	CRK5-HA 0 sec	CRK5-HA 15 sec	CRK5-HA 30 sec	CRK5-HA 60 sec	CRK5-HA 60 sec + 1294	CRK5-GFP 1 min	CRK5-GFP1 6 min	CRK5-GFP2 6 min	CRK5-GFP 30 min	CDKrs-GFP 1 min	CDKrs-GFP 6 min	CDKrs-GFP 30 min
PBANKA_144220	SOC2	cyclin-related protein, putative	63	153	112	107	25	112	41	47	59	64	44	76	45	39	45	22	9	47
PBANKA_123020	CRK5	cdc2-related protein kinase 5 (CRK5)	21	53	49	38	12	44	28	33	38	37	23	31	21	20	12	3	3	14
PBANKA_082440	CDKrs	cyclin-dependent kinases regulatory subunit, putative	8	22	15	17	4	21	8	9	11	19	8	16	8	8	8	6	3	12
PBANKA_102490	MCM2	DNA replication licensing factor MCM2, putative (MCM2)	11	48	46	36	6	42	111	91	99	81	88	36	0	0	21	5	0	25
PBANKA_141560	MCM4	DNA replication licensing factor MCM4, putative (MCM4)	7	44	43	37	5	43	84	82	84	56	79	28	0	0	18	6	0	25
PBANKA_124180	MCM3	DNA replication licensing factor MCM3, putative (MCM3)	11	50	40	33	8	36	84	73	78	66	64	29	0	6	14	3	0	19
PBANKA_123220	FACT-L	FACT complex subunit SPT16 (FACT-L)	11	60	47	38	4	45	55	49	63	45	53	42	0	0	4	0	0	13
PBANKA_080310	MCM7	DNA replication licensing factor MCM7, putative (MCM7)	7	39	33	29	5	34	61	65	48	52	46	35	0	0	15	2	0	20
PBANKA_113160	MCM6	DNA replication licensing factor MCM6, putative (MCM6)	6	32	22	23	4	30	46	43	52	49	44	33	0	0	14	2	0	17
PBANKA_061020	MCM5	DNA replication licensing factor MCM5, putative (MCM5)	6	29	20	20	2	24	47	40	42	38	44	27	0	7	15	7	0	23
PBANKA_112910		DNA polymerase epsilon, catalytic subunit a, putative	2	44	28	18	2	31	54	45	52	53	42	3	0	0	0	0	0	0
PBANKA_060200	ORC1	origin recognition complex subunit 1, putative (ORC1)	8	48	39	35	5	36	40	36	38	28	23	9	0	0	0	0	0	0
PBANKA_146300	G377	osmiophilic body protein (G377)	0	0	0	0	0	0	58	65	56	63	80	0	3	3	3	0	0	5
PBANKA_111520	SOC9	conserved Plasmodium protein, unknown function	0	4	5	0	0	3	70	69	81	36	67	0	0	0	0	0	0	0
PBANKA_060430		conserved Plasmodium protein, unknown function	3	32	29	32	6	31	24	24	26	21	20	22	0	0	16	7	13	23
PBANKA_020300		chromatin assembly factor 1 protein WD40 domain, putative	4	30	27	21	4	22	26	26	37	24	31	17	0	0	19	10	7	22
PBANKA_031600		replication factor C subunit 1, putative	5	22	22	21	4	25	38	31	41	29	32	26	0	0	5	0	0	11
PBANKA_041660		replication protein A1, small fragment	5	27	22	20	6	18	30	22	33	49	24	19	0	0	0	4	0	13
PBANKA_101140		DNA topoisomerase II, putative	0	43	32	26	3	33	31	32	27	25	24	7	0	0	0	0	0	4
PBANKA_031250	ORC5	origin recognition complex subunit 5, putative (ORC5)	7	47	31	31	8	31	25	29	27	15	20	8	0	0	2	0	0	0
PBANKA_080300	ORC2	origin recognition complex subunit 2, putative (ORC2)	11	43	38	30	5	31	21	25	16	15	19	11	0	0	2	0	0	4
PBANKA_051390	ORC3	conserved Plasmodium protein, unknown function	15	47	33	36	4	33	17	23	19	15	15	11	0	0	0	0	0	2
PBANKA_061160	SOC7	ribonucleoside-diphosphate reductase, large subunit, putative	0	0	0	0	0	0	16	18	22	6	18	25	7	20	30	40	18	45
PBANKA_060740		protein phosphatase, putative	2	19	18	16	0	18	38	38	28	26	25	21	0	0	2	0	0	9
PBANKA_061320		DNA polymerase alpha, putative	2	29	22	15	2	18	28	28	30	32	24	14	0	0	0	0	0	3
PBANKA_050130		DNA polymerase delta catalytic subunit, putative	3	27	17	20	0	25	21	29	30	25	28	18	0	0	0	0	0	2
PBANKA_112350	ISWI	SNF2 helicase, putative (ISWI)	3	24	15	10	0	14	34	39	33	27	27	18	0	0	0	0	0	0
PBANKA_121470		conserved Plasmodium protein, unknown function	0	3	0	0	0	0	48	53	59	34	43	0	0	0	0	0	0	0
PBANKA_130530	FACT-S	FACT complex subunit SSRP1, putative (FACT-S)	4	32	32	24	6	29	17	14	17	13	18	16	0	0	6	2	0	8
PBANKA_134880	ORC4	conserved Plasmodium protein, unknown function	5	38	31	30	6	34	25	22	17	7	16	5	0	0	0	0	0	0
PBANKA_140260		DNA ligase I, putative	0	16	13	11	2	16	23	26	27	17	20	15	0	0	17	4	0	28
PBANKA_091750		structural maintenance of chromosome protein, putative	0	14	9	3	0	9	38	41	47	32	39	0	0	0	0	0	0	0
PBANKA_121770	DOZI	ATP-dependent RNA helicase DDX6 (DOZI)	0	11	5	4	2	8	36	41	39	30	25	3	5	11	0	0	0	9
PBANKA_103410		DNA repair helicase, putative	3	25	22	15	2	22	22	24	20	31	22	10	0	0	0	0	0	3
PBANKA_092540		dynein heavy chain, putative	0	0	0	0	0	0	70	55	46	14	36	0	0	0	0	0	0	0
PBANKA_061520	CDPK4	calcium-dependent protein kinase 4 (CDPK4)	6	19	12	17	0	19	17	26	21	14	21	12	0	0	8	4	5	16
PBANKA_071600		chromosome associated protein, putative	2	7	6	5	0	7	40	37	47	28	35	0	0	0	0	0	0	0
PBANKA_021400		dynein heavy chain, putative	0	0	0	0	0	0	45	48	49	27	40	0	0	0	0	0	0	0
PBANKA_071210		DNA helicase, putative	0	28	21	17	2	18	24	22	23	19	18	12	0	0	0	0	0	4
PBANKA_135630	CDT1	conserved Plasmodium protein, unknown function	0	18	8	5	0	10	47	42	34	13	24	2	0	0	0	0	0	4
PBANKA_141790		conserved Plasmodium protein, unknown function	0	18	12	8	0	12	34	23	30	27	26	9	0	0	2	0	0	6
PBANKA_141690		chromosome segregation protein, putative	0	16	13	8	0	15	22	30	33	18	24	5	0	0	0	0	0	0
PBANKA_110290	CDC6	conserved Plasmodium protein, unknown function	0	23	13	11	0	11	19	19	22	17	25	17	0	0	0	0	0	5
PBANKA_110870		chromosome condensation protein, putative	0	19	12	9	0	15	24	22	24	17	22	15	0	0	0	0	0	0
PBANKA_080430	MSH2-2	DNA mismatch repair protein MSH2 (MSH2-2)	0	17	7	6	0	13	22	24	20	20	17	20	0	0	3	0	0	7
PBANKA_070470	SOC5	conserved Plasmodium protein, unknown function	0	4	2	0	0	2	43	30	41	23	27	0	0	0	0	0	0	0
PBANKA_103010		actin II	0	8	7	7	0	5	18	18	21	16	16	10	0	0	11	7	3	16
PBANKA_145510		replication factor C subunit 4, putative	0	20	14	9	2	16	15	13	18	14	12	17	0	0	4	0	0	8
PBANKA_091990		6-phosphofructokinase, putative	0	2	0	0	0	2	26	31	40	26	29	0	0	0	0	0	0	0
PBANKA_041610		dynein heavy chain, putative	0	0	0	0	0	0	51	38	31	16	18	0	0	0	0	0	0	0
PBANKA_113790	PCNA	proliferating cell nuclear antigen, putative (PCNA)	0	12	13	10	2	11	12	11	13	14	14	8	0	0	11	2	4	13
PBANKA_030710		conserved Plasmodium protein, unknown function	0	18	14	3	0	9	13	17	21	22	15	6	0	0	0	0	0	0
PBANKA_010390		RNA-binding protein, putative	0	8	7	8	0	8	24	19	26	14	18	2	0	0	0	0	0	2
PBANKA_051990		conserved Plasmodium protein, unknown function	0	0	0	0	0	0	35	27	26	21	23	0	0	0	0	0	0	0
PBANKA_031470		replication factor C subunit 2, putative	3	16	11	10	3	10	10	9	8	5	11	15	0	0	3	2	0	11
PBANKA_114280		conserved Plasmodium protein, unknown function	0	4	4	0	0	2	27	25	23	27	14	0	0	0	0	0	0	0
PBANKA_134320	POUF7	conserved Plasmodium protein, unknown function	0	11	7	4	0	7	21	18	10	18	15	8	0	0	0	0	0	0
PBANKA_121400		heat shock protein 60, putative	0	0	0	0	0	0	12	14	21	16	11	4	0	0	18	5	0	16
PBANKA_081130		Ran-binding protein, putative	0	8	8	3	3	4	13	14	16	9	17	11	0	0	2	2	0	4
PBANKA_093650	RFC5	replication factor C subunit 5, putative (RFC5)	2	11	8	7	0	7	12	13	13	7	13	10	0	0	4	2	0	5
PBANKA_120270		RNA-binding protein, putative	0	8	8	7	0	8	17	16	18	12	14	0	0	0	0	0	0	0
PBANKA_132020		conserved Plasmodium protein, unknown function	0	0	0	0	0	0	25	21	30	13	19	0	0	0	0	0	0	0
PBANKA_135830		conserved Plasmodium protein, unknown function	0	12	10	5	0	5	19	12	14	16	12	2	0	0	0	0	0	0
PBANKA_135640	RAD5	DNA repair protein RAD5, putative (RAD5)	0	8	7	6	0	5	17	14	17	18	10	3	0	0	0	0	0	0
PBANKA_141030		M1-family alanyl aminopeptidase, putative	0	2	0	0	0	2	11	13	14	8	15	0	0	0	6	0	3	31
PBANKA_112620	DJ1	protein DJ-1, putative (DJ1)	0	2	2	0	0	0	6	10	11	5	13	11	0	7	8	10	7	12
PBANKA_100060		erythrocyte membrane antigen 1	0	0	0	0	0	0	9	22	24	20	27	0	0	0	0	0	0	2
PBANKA_082800		zinc finger protein, putative	0	2	0	0	0	0	19	25	22	17	18	0	0	0	0	0	0	0
PBANKA_145020	SHMT	serine hydroxymethyltransferase, putative (SHMT)	0	5	3	4	0	4	7	11	8	11	9	5	0	0	13	6	0	16
PBANKA_100610	FEN1	flap endonuclease 1, putative (FEN1)	0	9	7	4	0	7	14	9	11	12	10	7	0	0	5	0	0	6
PBANKA_133690		conserved Plasmodium protein, unknown function	0	11	8	6	2	9	9	11	12	13	10	6	0	0	0	0	0	0
PBANKA_020250		replication factor c protein, putative	0	13	7	6	0	12	14	12	13	9	10	0	0	0	0	0	0	0
PBANKA_091440	UIS24	heat shock protein 70, putative (UIS24)	0	0	0	0	0	0	9	8	9	4	7	4	0	0	30	4	0	21
PBANKA_111770	MDH	malate dehydrogenase, putative (MDH)	0	5	0	3	0	3	13	12	9	9	14	6	0	0	4	7	0	11
PBANKA_132680		replication factor C3, putative	0	14	9	9	3	11	6	5	7	5	7	12	0	0	2	0	0	5
PBANKA_061920	PSOP1	secreted ookinete protein, putative (PSOP1)	2	2	0	0	0	0	14	25	15	15	18	0	0	0	0	0	0	3
PBANKA_100950		NAD(P)H-dependent glutamate synthase, putative	0	6	0	0	0	0	15	21	21	14	17	0	0	0	0	0	0	0
PBANKA_100310	PRPF8	pre-mRNA-processing-splicing factor 8, putative (PRPF8)	0	4	3	0	0	2	19	17	20	8	20	0	0	0	0	0	0	0
PBANKA_090880		conserved Plasmodium protein, unknown function	0	14	7	6	0	8	11	8	11	8	9	4	0	0	0	0	0	2
PBANKA_121090		phosphoglucomutase, putative	0	2	0	0	0	2	9	9	12	4	10	7	0	3	5	12	0	12
PBANKA_081200		DNA primase large subunit, putative	2	10	6	7	0	9	10	9	7	10	8	4	0	0	0	0	0	3
PBANKA_144110	HAD2	haloacid dehalogenase-like hydrolase, putative (HAD2)	0	7	4	2	0	5	11	14	13	8	11	2	0	0	2	0	0	6
PBANKA_080120		erythrocyte membrane-associated antigen, putative	0	0	0	0	0	0	24	18	18	8	16	0	0	0	0	0	0	0
PBANKA_120500		RNA-binding protein, putative	2	5	3	5	0	5	15	14	15	6	13	0	0	0	0	0	0	0
PBANKA_094310	NOT1	CCR4-NOT transcription complex subunit 1, putative (NOT1)	0	0	0	0	0	0	17	19	19	10	18	0	0	0	0	0	0	0
PBANKA_061370		RNA-binding protein, putative	0	9	5	2	0	3	15	12	18	5	13	0	0	0	0	0	0	0
PBANKA_130260		DNA primase small subunit, putative	0	8	8	6	0	5	8	7	10	8	11	3	0	0	0	0	0	7
PBANKA_071590	USP13	ubiquitin carboxyl-terminal hydrolase 13, putative (USP13)	0	3	4	2	0	3	11	13	12	6	14	0	0	0	3	0	0	10
PBANKA_030330		conserved Plasmodium protein, unknown function	0	9	7	5	0	8	5	8	10	18	7	3	0	0	0	0	0	0
PBANKA_070740		RNA-binding protein, putative	0	5	0	3	0	2	15	11	16	9	14	0	0	0	3	0	0	2
PBANKA_040150		exportin-1, putative	0	8	3	3	0	3	10	13	15	6	16	0	0	0	0	0	0	0
PBANKA_062130		conserved Plasmodium protein, unknown function	0	3	2	2	0	0	14	14	17	10	15	0	0	0	0	0	0	0
PBANKA_081850		conserved Plasmodium protein, unknown function	0	10	8	5	0	5	5	7	11	8	5	10	0	0	0	0	0	2
PBANKA_010080		conserved Plasmodium protein, unknown function	0	0	0	0	0	0	16	16	19	10	15	0	0	0	0	0	0	0
PBANKA_133750		conserved Plasmodium protein, unknown function	0	4	4	3	0	0	14	16	13	9	13	0	0	0	0	0	0	0
PBANKA_010330		conserved Plasmodium protein, unknown function	0	0	0	0	0	0	17	15	19	10	14	0	0	0	0	0	0	0
PBANKA_102960		conserved Plasmodium protein, unknown function	0	9	6	4	2	9	9	8	9	7	6	5	0	0	0	0	0	0
PBANKA_093850		succinyl-CoA synthetase alpha subunit, putative	0	0	0	0	0	0	0	0	3	3	4	4	0	8	14	13	6	19
PBANKA_103820	MISFIT	nuclear formin-like protein (MISFIT)	0	7	4	0	0	4	15	12	11	8	13	0	0	0	0	0	0	0
PBANKA_101970		conserved Plasmodium protein, unknown function	0	0	0	0	0	0	18	18	15	10	12	0	0	0	0	0	0	0
PBANKA_133760		translation initiation factor EIF-2B subunit, putative	0	5	5	2	0	3	9	7	12	13	10	6	0	0	0	0	0	0
PBANKA_145830		kinesin-13, putative	0	5	4	2	0	3	16	11	13	6	10	2	0	0	0	0	0	0
PBANKA_142430		conserved Plasmodium protein, unknown function	4	9	5	6	0	5	6	5	8	4	7	6	0	0	2	0	0	3
PBANKA_050730		dynein heavy chain, putative	0	0	0	0	0	0	21	17	17	5	10	0	0	0	0	0	0	0
PBANKA_020270		kinesin-8, putative	0	0	0	0	0	0	18	19	14	6	11	0	0	0	0	0	0	0
PBANKA_123760		zinc finger protein, putative, fragment	0	0	0	0	0	0	17	16	12	8	15	0	0	0	0	0	0	0
PBANKA_123210	SR1	pre-mRNA-splicing factor, putative (SR1)	4	5	0	2	0	2	10	12	12	7	10	3	0	0	0	0	0	0
PBANKA_132690		DNA polymerase alpha subunit, putative	0	9	6	5	0	6	8	6	6	8	7	5	0	0	0	0	0	0
PBANKA_100380		vacuolar ATP synthase subunit b, putative	0	0	0	0	0	0	9	9	8	3	8	0	0	0	11	5	0	13
PBANKA_010530		conserved Plasmodium protein, unknown function	0	0	0	0	0	0	14	16	17	5	14	0	0	0	0	0	0	0
PBANKA_134940		conserved Plasmodium protein, unknown function	0	6	5	6	0	6	8	6	10	9	9	0	0	0	0	0	0	0
PBANKA_136430		glycerol kinase, putative	0	0	0	0	0	0	10	12	14	10	8	0	0	0	3	0	0	7
PBANKA_124230	HIP	Hsc70-interacting protein,58 kDa phosphoprotein (HIP)	3	7	5	4	0	5	9	7	6	0	7	3	0	0	3	0	0	4
PBANKA_080700	RPB1	DNA-directed RNA polymerase II subunit RPB1, putative (RPB1)	0	0	0	0	0	0	15	11	19	6	12	0	0	0	0	0	0	0
PBANKA_123250		eukaryotic translation initiation factor 3 subunit, putative	0	3	4	0	0	3	13	14	11	7	8	0	0	0	0	0	0	0
PBANKA_110160		chromosome assembly factor 1, putative	0	5	3	4	0	4	8	6	10	5	11	6	0	0	0	0	0	0
PBANKA_050580		deoxyribose-phosphate aldolase, putative	0	0	0	0	0	0	6	10	9	8	7	3	0	0	3	5	0	11
PBANKA_100340	UIS14	lysine decarboxylase, putative (UIS14)	0	0	0	0	0	0	16	16	15	3	12	0	0	0	0	0	0	0
PBANKA_145460		conserved Plasmodium protein, unknown function	0	0	3	3	0	2	11	11	14	9	9	0	0	0	0	0	0	0
PBANKA_070640	SOC4	conserved Plasmodium protein, unknown function	0	8	6	4	0	5	5	6	10	10	7	0	0	0	0	0	0	0
PBANKA_010560		translation initiation factor IF-2, putative	0	5	0	3	0	2	10	12	8	9	12	0	0	0	0	0	0	0
PBANKA_144070	UBA1	ubiquitin-activating enzyme E1, putative (UBA1)	0	7	4	3	0	3	6	8	13	6	8	0	0	0	2	0	0	0
PBANKA_010740	OAT	ornithine aminotransferase, putative (OAT)	0	6	2	0	0	2	5	5	6	3	4	3	0	0	8	5	0	11
PBANKA_144900		aspartyl protease, putative	0	3	0	0	0	0	8	7	10	7	6	6	0	0	2	0	0	11
PBANKA_102230		mannose-1-phosphate guanyltransferase, putative	0	0	0	0	0	0	6	9	8	3	7	0	0	0	6	8	0	11
PBANKA_112290	HK	hexokinase, putative (HK)	0	0	0	0	0	0	3	6	0	5	0	5	0	0	11	5	5	16
PBANKA_041280	eIF4E	translation initiation factor 4E, putative (eIF4E)	0	4	3	2	0	3	9	11	7	9	8	0	0	0	0	0	0	0
PBANKA_080150		conserved Plasmodium protein, unknown function	0	2	0	0	0	0	13	14	13	5	9	0	0	0	0	0	0	0
PBANKA_122740	CNA	serine/threonine protein phosphatase 2B catalytic subunit A, putative (CNA)	0	5	5	0	0	2	12	12	9	3	8	0	0	0	0	0	0	0
PBANKA_143220	MDV1	male development gene 1 (MDV1)	0	0	0	0	0	0	8	11	11	7	12	3	0	0	0	0	0	4
PBANKA_142720		protein phosphatase 2C, putative	0	6	5	4	0	5	5	9	5	6	8	2	0	0	0	0	0	0
PBANKA_121360	CysRS	cysteine--tRNA ligase, putative (CysRS)	0	0	0	0	0	0	7	11	10	9	8	0	0	0	0	2	0	8
PBANKA_093370	MAPK2	mitogen-activated protein kinase 2 (MAPK2)	0	4	2	3	0	5	9	5	5	9	4	0	0	0	0	0	0	7
PBANKA_020520		conserved Plasmodium protein, unknown function	0	0	0	0	0	0	8	12	19	3	11	0	0	0	0	0	0	0
PBANKA_103520	CCp3	LCCL domain-containing protein (CCp3)	0	0	0	0	0	0	13	7	14	5	12	0	0	0	0	0	0	2
PBANKA_123450		conserved Plasmodium protein, unknown function	0	4	2	3	0	2	8	9	8	7	10	0	0	0	0	0	0	0
PBANKA_091610		nucleic acid binding protein, putative	0	4	4	3	0	4	6	0	5	5	4	11	0	0	2	0	0	4
PBANKA_092160		RNA-binding protein, putative	0	4	3	2	0	3	8	10	8	5	9	0	0	0	0	0	0	0
PBANKA_080410		conserved Plasmodium protein, unknown function	0	0	0	0	0	0	9	12	13	7	11	0	0	0	0	0	0	0
PBANKA_030180		conserved Plasmodium protein, unknown function	0	5	4	2	0	2	9	7	8	7	4	3	0	0	0	0	0	0
PBANKA_040560		EB1 homolog, putative	0	3	2	3	0	0	9	8	9	6	9	2	0	0	0	0	0	0
PBANKA_133710	SF1	splicing factor 1, putative (SF1)	0	6	3	0	0	3	10	8	12	0	9	0	0	0	0	0	0	0
PBANKA_121100	GMPS	GMP synthetase, putative (GMPS)	0	4	5	3	0	4	6	7	7	5	6	0	0	0	0	0	0	3
PBANKA_060480		eukaryotic translation initiation factor 3 subunit 8, putative	0	3	0	0	0	0	12	12	10	5	8	0	0	0	0	0	0	0
PBANKA_061670	NEK4	NIMA related kinase 4 (NEK4)	0	2	2	2	0	0	11	9	11	4	7	0	0	0	0	0	0	2
PBANKA_112640		transportin, putative	0	3	2	0	0	0	13	7	7	6	8	2	0	0	0	0	0	2
PBANKA_120220		U5 small nuclear ribonuclear protein, putative	0	4	0	0	0	0	13	9	9	6	9	0	0	0	0	0	0	0
PBANKA_123350	PUF1	mRNA-binding protein PUF1 (PUF1)	0	0	0	0	0	0	10	10	14	6	10	0	0	0	0	0	0	0
PBANKA_130970	DDX5	ATP-dependent RNA helicase DDX5, putative (DDX5)	0	5	3	0	0	2	10	8	9	5	8	0	0	0	0	0	0	0
PBANKA_132010	UIS25	conserved Plasmodium protein, unknown function (UIS25)	0	0	0	0	0	0	16	10	11	5	8	0	0	0	0	0	0	0
PBANKA_061230		conserved Plasmodium protein, unknown function	0	5	3	2	0	4	7	9	8	5	6	0	0	0	0	0	0	0
PBANKA_142500		RNA-binding protein, putative	0	4	3	3	0	3	10	7	9	5	5	0	0	0	0	0	0	0
PBANKA_080360		importin-7, putative	0	0	0	0	0	0	9	9	11	9	7	0	0	0	2	0	0	2
PBANKA_090850		myosin heavy chain subunit, putative	0	4	5	3	0	4	9	9	6	4	4	0	0	0	0	0	0	0
PBANKA_101080	CAF16	CCR4-associated factor 16, putative (CAF16)	0	2	2	2	0	3	5	5	5	4	6	2	0	0	5	2	0	5
PBANKA_113380		DNA helicase, putative	0	5	3	0	0	3	4	9	6	9	9	0	0	0	0	0	0	0
PBANKA_113820	RUVB3	RuvB-like helicase 3, putative (RUVB3)	0	4	3	0	0	3	8	9	7	6	6	0	0	0	0	0	0	2
PBANKA_134660		glutamine--tRNA ligase, putative	0	0	0	0	0	2	9	11	9	7	7	0	0	0	0	0	0	3
PBANKA_133640		DnaJ protein, putative	0	5	4	0	0	0	11	10	10	0	8	0	0	0	0	0	0	0
PBANKA_092510	LRR11	leucine-rich repeat protein (LRR11)	0	8	3	4	0	5	5	6	5	7	4	0	0	0	0	0	0	0
PBANKA_146370		DNA repair protein rhp16, putative	0	5	3	3	0	4	7	7	7	3	8	0	0	0	0	0	0	0
PBANKA_041490		dynein light intermediate chain 2, putative	0	0	0	0	0	0	13	11	13	4	6	0	0	0	0	0	0	0
PBANKA_050610		conserved Plasmodium protein, unknown function	0	0	0	0	0	0	9	9	14	6	9	0	0	0	0	0	0	0
PBANKA_061220		conserved Plasmodium protein, unknown function	0	2	2	0	0	2	10	5	9	12	5	0	0	0	0	0	0	0
PBANKA_112530		conserved Plasmodium protein, unknown function	0	0	0	0	0	0	12	15	9	6	5	0	0	0	0	0	0	0
PBANKA_103660		ribonucleotide reductase small subunit, putative	0	4	3	2	0	3	0	0	3	0	4	0	0	0	8	6	0	13
PBANKA_120210		conserved Plasmodium protein, unknown function	0	0	0	0	0	0	9	11	9	7	10	0	0	0	0	0	0	0
PBANKA_051750		bromodomain protein, putative	0	3	0	0	0	2	12	8	8	4	8	0	0	0	0	0	0	0
PBANKA_093860	CK2alpha	casein kinase 2, alpha subunit (CK2alpha)	0	6	4	4	0	5	3	4	3	3	3	5	0	0	0	0	0	4
PBANKA_132240		exonuclease V, mitochondrial, putative	0	3	3	0	0	2	5	5	5	4	4	2	0	0	3	0	0	8
PBANKA_051360	ADA	adenosine deaminase, putative (ADA)	0	2	2	0	0	2	6	7	8	7	10	0	0	0	0	0	0	0
PBANKA_071650		RNA-binding protein, putative	0	4	3	0	0	5	6	6	7	6	6	0	0	0	0	0	0	0
PBANKA_081350		conserved Plasmodium protein, unknown function	0	3	0	0	0	2	8	9	9	7	5	0	0	0	0	0	0	0
PBANKA_102830	PP1	serine/threonine protein phosphatase PP1 (PP1)	0	3	2	0	0	0	5	7	6	4	6	0	0	0	5	0	0	5
PBANKA_122800		1-cys peroxiredoxin, putative	0	0	0	0	0	0	5	4	6	5	4	0	0	0	4	5	0	9
PBANKA_130070	CCp1	LCCL domain-containing protein (CCp1)	0	0	0	0	0	0	8	5	13	3	13	0	0	0	0	0	0	0
PBANKA_101830		dynein-associated protein, putative	0	0	0	0	0	0	15	10	10	0	7	0	0	0	0	0	0	0
PBANKA_080790		conserved Plasmodium protein, unknown function	0	0	0	0	0	0	11	8	10	6	6	0	0	0	0	0	0	0
PBANKA_091740	PF16	armadillo repeat protein PF16 (PF16)	0	3	2	0	0	2	8	9	6	7	4	0	0	0	0	0	0	0
PBANKA_100720	RPA1	replication protein A1, large subunit, putative (RPA1)	0	0	0	0	0	0	10	9	7	7	8	0	0	0	0	0	0	0
PBANKA_082480		RNA-binding protein, putative	0	3	3	3	0	2	5	5	7	5	7	0	0	0	0	0	0	0
PBANKA_070800	SEC23	protein transport protein SEC23, putative (SEC23)	0	0	0	0	0	0	10	8	11	4	5	0	0	0	0	0	0	2
PBANKA_124390		conserved Plasmodium protein, unknown function	0	5	2	2	0	3	7	5	8	5	3	0	0	0	0	0	0	0
PBANKA_131920		AP-1 complex subunit gamma, putative	0	0	0	0	0	0	9	8	8	7	8	0	0	0	0	0	0	0
PBANKA_134150		RNA-binding protein, putative	0	0	2	2	0	2	6	7	8	6	7	0	0	0	0	0	0	0
PBANKA_140350		conserved Plasmodium protein, unknown function	0	2	2	0	0	0	9	8	9	6	4	0	0	0	0	0	0	0
PBANKA_134430		chromatin assembly factor 1 subunit, putative	0	7	4	6	0	5	3	0	0	3	0	8	0	0	0	0	0	4
PBANKA_090690		conserved Plasmodium protein, unknown function	0	0	0	0	0	0	11	8	12	0	9	0	0	0	0	0	0	0
PBANKA_130510		60S ribosomal protein L10a, putative	0	5	4	4	0	4	4	4	4	4	6	0	0	0	0	0	0	0
PBANKA_113550	HMGB4	high mobility group protein B4, putative (HMGB4)	0	7	7	2	0	2	0	4	7	4	6	0	0	0	0	0	0	0
PBANKA_041500		Maf-like protein, putative	0	0	0	2	0	2	6	5	4	6	3	0	0	0	2	0	0	8
PBANKA_081060		exoribonuclease, putative	0	3	0	0	0	0	10	8	11	0	6	0	0	0	0	0	0	0
PBANKA_052290	BRR2	pre-mRNA-splicing helicase BRR2, putative (BRR2)	0	0	0	0	0	0	7	6	12	4	8	0	0	0	0	0	0	0
PBANKA_081620		ribonuclease H2 subunit C, putative	0	3	2	2	0	3	4	4	4	7	4	0	0	0	0	0	0	4
PBANKA_102520	CBF5	H/ACA ribonucleoprotein complex subunit 4, putative (CBF5)	0	7	2	0	0	0	4	6	8	5	5	0	0	0	0	0	0	0
PBANKA_143520		conserved Plasmodium protein, unknown function	0	0	0	0	0	0	7	7	10	5	8	0	0	0	0	0	0	0
PBANKA_010410	ARK1	serine/threonine protein kinase, putative (ARK1)	0	6	6	5	0	6	3	4	4	0	3	0	0	0	0	0	0	0
PBANKA_144940	SF3B3	splicing factor 3B subunit 3, putative (SF3B3)	0	3	2	0	0	0	6	6	9	4	6	0	0	0	0	0	0	0
PBANKA_141000	RPT1	26S protease regulatory subunit 7, putative (RPT1)	0	0	2	0	0	0	5	6	7	0	7	4	0	0	2	0	0	3
PBANKA_114360	AlaRS	alanine--tRNA ligase, putative (AlaRS)	0	0	0	0	0	0	5	7	10	0	8	0	0	0	0	0	0	6
PBANKA_030780		conserved Plasmodium protein, unknown function	0	2	2	0	0	2	7	7	5	5	5	0	0	0	0	0	0	0
PBANKA_040210		spindle pole body protein, putative	0	0	0	0	0	0	9	9	8	5	4	0	0	0	0	0	0	0
PBANKA_132100		conserved Plasmodium protein, unknown function	0	0	0	0	0	0	5	6	8	5	11	0	0	0	0	0	0	0
PBANKA_142240		importin beta, putative	0	0	0	0	0	2	7	7	7	5	7	0	0	0	0	0	0	0
PBANKA_112250		conserved Plasmodium protein, unknown function	0	0	0	0	0	0	9	7	11	0	8	0	0	0	0	0	0	0
PBANKA_130400		conserved Plasmodium protein, unknown function	0	0	0	0	0	0	8	10	7	0	10	0	0	0	0	0	0	0
PBANKA_130800		conserved Plasmodium protein, unknown function	0	0	0	0	0	0	12	9	9	0	5	0	0	0	0	0	0	0
PBANKA_133830		60S ribosomal protein L6, putative	0	4	2	3	0	0	0	5	6	0	6	6	0	0	0	0	0	3
PBANKA_051590	DCP1	mRNA-decapping enzyme subunit 1, putative (DCP1)	0	0	0	0	0	0	10	7	4	8	5	0	0	0	0	0	0	0
PBANKA_144230		conserved Plasmodium protein, unknown function	0	4	0	0	0	2	7	5	5	5	6	0	0	0	0	0	0	0
PBANKA_040630		DNA polymerase epsilon subunit b, putative	0	2	2	2	0	2	4	7	6	0	3	2	0	0	2	0	0	2
PBANKA_010540		coatomer alpha subunit, putative	0	0	0	0	0	0	8	6	8	5	6	0	0	0	0	0	0	0
PBANKA_021060		ubiquitin carboxyl-terminal hydrolase, putative	0	0	0	0	0	2	7	5	8	5	6	0	0	0	0	0	0	0
PBANKA_124280		eukaryotic translation initiation factor 3, subunit 6, putative	0	2	2	0	0	2	5	4	7	4	7	0	0	0	0	0	0	0
PBANKA_132090	TRX1	thioredoxin 1, putative (TRX1)	0	0	0	0	0	0	4	8	8	6	4	0	0	0	0	0	0	3
PBANKA_135890	SOC8	dynactin subunit 2, putative	0	0	0	0	0	0	7	6	10	5	5	0	0	0	0	0	0	0
PBANKA_131200		conserved Plasmodium protein, unknown function	0	8	4	0	0	4	4	4	0	5	4	0	0	0	0	0	0	0
PBANKA_131810	APP	aminopeptidase P, putative (APP)	0	0	0	0	0	0	0	3	6	0	0	0	0	0	3	4	6	10
PBANKA_083430		gamma-tubulin complex component, putative	0	3	0	0	0	0	7	6	7	5	4	0	0	0	0	0	0	0
PBANKA_080230		E3 ubiquitin-protein ligase, putative	0	0	0	0	0	0	8	8	8	0	8	0	0	0	0	0	0	0
PBANKA_090960	ApiAP2	transcription factor with AP2 domain(s), putative (ApiAP2)	0	3	3	0	0	0	12	6	4	4	0	0	0	0	0	0	0	0
PBANKA_052280	RPS19	40S ribosomal protein S19, putative (RPS19)	0	0	0	0	0	0	5	4	5	0	0	4	0	5	3	2	0	3
PBANKA_031240		DNA-directed RNA polymerase II second largest subunit, putative	0	0	0	0	0	0	9	6	6	6	4	0	0	0	0	0	0	0
PBANKA_102550		NOT family protein, putative	0	0	0	0	0	0	7	12	5	3	4	0	0	0	0	0	0	0
PBANKA_103600		conserved Plasmodium protein, unknown function	0	0	0	0	0	0	6	7	10	4	4	0	0	0	0	0	0	0
PBANKA_135920	ALBA2	DNA/RNA-binding protein Alba 2, putative (ALBA2)	0	0	0	0	0	0	7	7	7	6	4	0	0	0	0	0	0	0
PBANKA_101320		ATP-specific succinyl-CoA synthetase beta subunit, putative	0	0	0	0	0	0	0	3	0	0	3	0	0	0	9	3	0	13
PBANKA_124270		AP-1 complex subunit beta, putative	0	0	0	0	0	0	7	8	11	0	5	0	0	0	0	0	0	0
PBANKA_134770		isoleucine--tRNA ligase, putative	0	0	0	0	0	0	5	7	10	0	5	0	0	0	2	0	0	2
PBANKA_100200		conserved Plasmodium protein, unknown function	0	3	2	3	0	2	4	4	6	3	0	0	0	0	0	0	0	4
PBANKA_050810	CHD1	chromodomain-helicase-DNA-binding protein 1, putative (CHD1)	0	2	0	0	0	0	9	5	6	4	4	0	0	0	0	0	0	0
PBANKA_062080		conserved Plasmodium protein, unknown function	0	0	0	0	0	0	7	7	7	4	4	0	0	0	0	0	0	0
PBANKA_094270	SNF2L	chromatin remodeling protein, putative (SNF2L)	0	0	0	0	0	0	7	5	6	3	8	0	0	0	0	0	0	0
PBANKA_131640		U1 snRNA associated protein, putative	0	2	0	0	0	0	6	5	6	5	5	0	0	0	0	0	0	0
PBANKA_123790		mitochondrial processing peptidase alpha subunit, putative	0	0	0	0	0	0	6	4	3	3	5	0	0	0	4	0	0	3
PBANKA_120700	NOP5	nucleolar protein 5, putative (NOP5)	0	4	2	3	0	0	5	0	3	5	6	0	0	0	0	0	0	0
PBANKA_135880		conserved Plasmodium protein, unknown function	0	4	3	2	0	2	5	4	4	0	4	0	0	0	0	0	0	0
PBANKA_122680		DNA repair protein RAD54, putative	0	0	0	0	0	0	7	4	7	3	6	0	0	0	0	0	0	0
PBANKA_132320		conserved Plasmodium protein, unknown function	0	0	0	0	0	0	5	6	8	3	5	0	0	0	0	0	0	0
PBANKA_136080		conserved Plasmodium protein, unknown function	0	0	0	0	0	0	6	6	7	3	5	0	0	0	0	0	0	0
PBANKA_145160	UBA2	SUMO-activating enzyme subunit 2, putative (UBA2)	0	2	0	0	0	2	4	5	6	4	4	0	0	0	0	0	0	0
PBANKA_130620		tRNA binding protein, putative	0	2	0	0	0	0	5	7	0	0	5	0	0	0	2	2	0	4
PBANKA_083000		RNA-binding protein, putative	0	0	0	0	0	0	6	5	7	0	9	0	0	0	0	0	0	0
PBANKA_113750	ADF2	actin-depolymerizing factor 2 (ADF2)	0	4	2	2	0	5	0	0	3	0	3	2	0	0	2	0	0	4
PBANKA_122210		regulator of chromosome condensation, putative	0	2	3	0	0	2	6	5	6	0	3	0	0	0	0	0	0	0
PBANKA_144540	SEC13	protein transport protein SEC13, putative (SEC13)	0	0	0	0	0	0	7	6	7	0	7	0	0	0	0	0	0	0
PBANKA_143420		arginine--tRNA ligase, putative	0	2	0	0	0	0	4	5	6	3	6	0	0	0	0	0	0	0
PBANKA_142670		dihydropteroate synthetase, putative	0	0	0	0	0	0	6	0	3	4	3	0	0	0	2	2	0	6
PBANKA_020450	CCp5	LCCL domain-containing protein (CCp5)	0	0	0	0	0	0	5	4	9	0	6	0	0	0	0	0	0	2
PBANKA_092010		cochaperone prefoldin complex subunit, putative	0	3	4	0	0	0	5	5	5	0	4	0	0	0	0	0	0	0
PBANKA_142770	RUVB1	RuvB-like helicase 1, putative (RUVB1)	0	3	0	0	0	0	6	7	5	0	5	0	0	0	0	0	0	0
PBANKA_080770	EG5	kinesin-5, putative (EG5)	0	0	0	0	0	0	7	5	4	4	5	0	0	0	0	0	0	0
PBANKA_071960		memo-like protein	0	0	0	0	0	0	0	0	0	0	0	0	0	0	0	10	0	15
PBANKA_135970	P47	6-cysteine protein (P47)	0	0	0	0	0	0	0	3	4	0	4	3	0	0	0	3	0	8
PBANKA_100910		ataxin-2 like protein, putative	0	0	0	0	0	0	5	8	7	0	5	0	0	0	0	0	0	0
PBANKA_110300	SRSF12	serine/arginine-rich splicing factor 12, putative (SRSF12)	2	2	2	2	0	2	4	3	5	0	3	0	0	0	0	0	0	0
PBANKA_092080		CRAL/TRIO domain-containing protein, putative	0	0	0	0	0	0	7	5	5	4	3	0	0	0	0	0	0	0
PBANKA_093110		conserved Plasmodium protein, unknown function	0	0	0	0	0	0	5	5	6	3	5	0	0	0	0	0	0	0
PBANKA_144550		conserved Plasmodium protein, unknown function	0	0	0	0	0	0	7	5	5	3	4	0	0	0	0	0	0	0
PBANKA_135450		60S ribosomal protein L18-2, putative	0	0	0	0	0	0	4	0	5	0	5	4	3	3	0	0	0	0
PBANKA_091300		conserved Plasmodium protein, unknown function	0	3	5	0	0	2	5	3	3	0	3	0	0	0	0	0	0	0
PBANKA_144890		DNA polymerase epsilon subunit b, putative	0	6	0	2	0	3	3	0	3	3	4	0	0	0	0	0	0	0
PBANKA_102630		conserved Plasmodium protein, unknown function	0	0	0	0	0	0	4	5	5	5	4	0	0	0	0	0	0	0
PBANKA_040480		FAD-dependent glycerol-3-phosphate dehydrogenase, putative	0	0	0	0	0	0	0	0	0	0	0	6	0	0	3	3	0	11
PBANKA_051870		methionine--tRNA ligase, putative	0	2	0	0	0	0	0	5	5	5	0	0	0	0	0	2	0	4
PBANKA_092990		heat shock protein 90, putative	0	0	0	0	0	0	5	5	6	0	7	0	0	0	0	0	0	0
PBANKA_093930		conserved Plasmodium protein, unknown function	0	0	0	0	0	0	11	5	7	0	0	0	0	0	0	0	0	0
PBANKA_103230		cytidine triphosphate synthetase, putative	0	0	0	0	0	0	4	4	0	3	4	0	0	0	0	0	0	8
PBANKA_133210		conserved Plasmodium protein, unknown function	0	2	0	0	0	0	6	5	6	0	4	0	0	0	0	0	0	0
PBANKA_134410		myosin C, putative	0	0	0	0	0	0	4	6	6	0	7	0	0	0	0	0	0	0
PBANKA_136150		conserved Plasmodium protein, unknown function	0	0	0	0	0	0	5	7	6	0	5	0	0	0	0	0	0	0
PBANKA_112280		ribonuclease H2 subunit A, putative	0	5	3	0	0	3	3	3	3	3	0	0	0	0	0	0	0	0
PBANKA_144300	NEK1	NIMA related kinase 1, putative (NEK1)	0	0	0	0	0	0	5	5	5	4	3	0	0	0	0	0	0	0
PBANKA_050670		citrate synthase, mitochondrial precursor, putative	0	0	0	0	0	0	0	0	3	0	0	0	0	0	10	2	0	7
PBANKA_144140	PCNA2	proliferating cell nuclear antigen 2, putative (PCNA2)	0	0	0	0	0	0	0	3	0	0	0	3	0	0	6	2	0	8
PBANKA_040710	SF3B1	splicing factor 3B subunit 1, putative (SF3B1)	0	0	0	0	0	0	4	7	6	0	5	0	0	0	0	0	0	0
PBANKA_113190	PP5	serine/threonine protein phosphatase 5 (PP5)	0	0	0	0	0	0	5	3	8	0	6	0	0	0	0	0	0	0
PBANKA_142420		conserved Plasmodium protein, unknown function	0	0	0	0	0	0	7	5	4	0	6	0	0	0	0	0	0	0
PBANKA_145210		conserved Plasmodium protein, unknown function	0	0	0	0	0	0	4	6	8	4	0	0	0	0	0	0	0	0
PBANKA_080590		kinesin-8, putative	0	2	0	0	0	2	5	8	5	0	0	0	0	0	0	0	0	0
PBANKA_103060		p1/s1 nuclease, putative	0	0	0	0	0	0	0	0	5	4	3	0	0	0	4	0	0	6
PBANKA_091370		coatomer delta subunit, putative	0	2	0	0	0	0	6	3	4	3	3	0	0	0	0	0	0	0
PBANKA_020420		tubulin-specific chaperone a, putative	0	0	2	0	0	0	0	0	0	0	0	2	0	0	5	5	0	7
PBANKA_072020	SOC1	conserved Plasmodium protein, unknown function	0	0	0	0	0	2	7	5	4	0	3	0	0	0	0	0	0	0
PBANKA_091790	RPT5	26S protease regulatory subunit 6a, putative (RPT5)	0	0	0	0	0	0	3	4	6	0	4	2	0	0	0	0	0	2
PBANKA_113940	DOA1	polyubiquitin binding protein, putative (DOA1)	0	0	0	0	0	0	3	4	5	3	5	0	0	0	0	0	0	0
PBANKA_143410		conserved Plasmodium protein, unknown function	0	0	0	0	0	0	5	4	3	3	5	0	0	0	0	0	0	0
PBANKA_122280		tyrosine--tRNA ligase, putative	0	0	0	0	0	0	0	0	0	0	0	3	0	0	0	9	0	8
PBANKA_040110	SRPK1	serine/threonine protein kinase, putative (SRPK1)	0	0	0	0	0	0	3	4	5	0	8	0	0	0	0	0	0	0
PBANKA_040680	PRPF19	pre-mRNA-processing factor 19, putative (PRPF19)	0	0	0	0	0	0	5	6	4	0	5	0	0	0	0	0	0	0
PBANKA_131380	SRP54	signal recognition particle subunit SRP54, putative (SRP54)	0	0	0	0	0	0	4	5	4	0	7	0	0	0	0	0	0	0
PBANKA_040530		40S ribosomal protein S23, putative	0	3	0	0	0	0	0	0	0	0	6	2	4	3	2	0	0	0
PBANKA_081800		conserved Plasmodium protein, unknown function	0	2	2	0	0	0	4	0	3	4	5	0	0	0	0	0	0	0
PBANKA_103370		conserved Plasmodium protein, unknown function	0	0	0	0	0	0	4	7	7	0	0	0	0	0	0	0	0	2
PBANKA_120900		eukaryotic translation initiation factor 2 beta subunit, putative	0	2	0	0	0	0	4	3	4	4	0	0	0	0	0	0	0	3
PBANKA_134810		conserved Plasmodium protein, unknown function	0	2	2	2	0	2	3	4	5	0	0	0	0	0	0	0	0	0
PBANKA_141590		conserved Plasmodium protein, unknown function	0	0	0	2	0	2	4	3	3	0	4	0	0	0	0	0	0	2
PBANKA_113320	CRK2	cdc2-related kinase 2 (CRK2)	0	7	5	3	0	4	0	0	0	0	0	0	0	0	0	0	0	0
PBANKA_021210		eukaryotic translation initiation factor 2 alpha subunit, putative	0	0	0	0	0	0	5	6	4	0	4	0	0	0	0	0	0	0
PBANKA_050450		cytoplasmic dynein intermediate chain, putative	0	0	0	0	0	0	7	6	0	0	6	0	0	0	0	0	0	0
PBANKA_051740	Myb2	myb2 transcription factor, putative (Myb2)	0	0	0	0	0	0	5	4	6	0	4	0	0	0	0	0	0	0
PBANKA_103570		conserved Plasmodium protein, unknown function	0	0	0	0	0	0	8	4	4	0	3	0	0	0	0	0	0	0
PBANKA_135130		conserved Plasmodium protein, unknown function	0	0	0	0	0	0	6	0	5	4	4	0	0	0	0	0	0	0
PBANKA_030130		conserved Plasmodium protein, unknown function	0	2	0	0	0	0	7	0	4	6	0	0	0	0	0	0	0	0
PBANKA_061720		40S ribosomal protein S10, putative	0	3	0	0	0	2	4	5	5	0	0	0	0	0	0	0	0	0
PBANKA_094090	RUVB2	RuvB-like helicase 2, putative (RUVB2)	0	2	0	0	0	0	5	3	3	0	4	0	0	0	0	0	0	2
PBANKA_141440		exportin-1, putative	0	4	0	0	0	2	3	0	5	0	5	0	0	0	0	0	0	0
PBANKA_135860	IDH	isocitrate dehydrogenase (NADP), mitochondrial precursor, putative (IDH)	0	0	0	0	0	0	3	3	3	0	3	0	0	0	3	0	0	3
PBANKA_010090		ATP-dependent RNA helicase, putative	0	0	0	0	0	0	5	0	4	5	4	0	0	0	0	0	0	0
PBANKA_061570		dynein heavy chain, putative	0	0	0	0	0	0	11	7	0	0	0	0	0	0	0	0	0	0
PBANKA_071290	HMGB2	high mobility group protein B2, putative (HMGB2)	0	0	0	2	0	2	5	3	3	0	3	0	0	0	0	0	0	0
PBANKA_092410		conserved Plasmodium protein, unknown function	0	2	0	0	0	2	4	3	4	0	3	0	0	0	0	0	0	0
PBANKA_101490		coatamer protein, beta subunit, putative	0	0	0	0	0	0	0	4	8	3	3	0	0	0	0	0	0	0
PBANKA_102870	RPN13	26S proteasome regulatory subunit RPN13, putative (RPN13)	0	0	0	0	0	0	3	3	0	3	3	0	0	0	0	0	0	6
PBANKA_110610		conserved Plasmodium protein, unknown function	0	0	0	0	0	0	6	4	3	5	0	0	0	0	0	0	0	0
PBANKA_111010		topoisomerase I, putative	0	3	0	0	0	0	5	0	5	5	0	0	0	0	0	0	0	0
PBANKA_120110		conserved Plasmodium protein, unknown function	0	0	0	0	0	0	4	0	6	5	3	0	0	0	0	0	0	0
PBANKA_144680	CPN60	60 kDa chaperonin, putative (CPN60)	0	0	0	0	0	0	4	4	5	3	0	0	0	0	2	0	0	0
PBANKA_145880		kinesin, putative	0	0	0	0	0	0	5	3	4	0	4	0	0	0	0	0	0	2
PBANKA_133200	U2AF2	splicing factor U2AF large subunit, putative (U2AF2)	0	0	0	0	0	0	3	5	3	3	3	0	0	0	0	0	0	0
PBANKA_091930		spermidine synthase, putative	0	0	0	0	0	0	0	0	0	0	0	0	0	0	8	3	0	6
PBANKA_143800	PKAr	CAMP-dependent protein kinase regulatory subunit, putative (PKAr)	0	0	0	0	0	0	0	0	0	0	0	3	0	0	6	0	0	8
PBANKA_011040		eukaryotic translation initiation factor 3 subunit L, putative	0	0	0	0	0	0	7	0	4	6	0	0	0	0	0	0	0	0
PBANKA_021320		conserved Plasmodium protein, unknown function	0	0	0	0	0	0	3	0	6	3	5	0	0	0	0	0	0	0
PBANKA_041550	SEC27	beta subunit of coatomer complex, putative (SEC27)	0	0	0	0	0	0	4	4	5	4	0	0	0	0	0	0	0	0
PBANKA_041630		nucleoporin NUP100/NSP100, putative	0	0	0	0	0	0	5	4	5	3	0	0	0	0	0	0	0	0
PBANKA_060420		zinc finger protein, putative	0	0	0	0	0	0	4	3	6	0	4	0	0	0	0	0	0	0
PBANKA_071390	AK2	adenylate kinase 2, putative (AK2)	0	2	0	0	0	2	0	0	4	0	4	0	0	0	0	0	0	5
PBANKA_100880		glucose-6-phosphate isomerase, putative	0	0	0	0	0	0	5	0	4	0	3	0	0	0	3	0	0	2
PBANKA_101790	PEPC	phosphoenolpyruvate carboxylase (PEPC)	0	0	0	0	0	0	3	4	5	0	5	0	0	0	0	0	0	0
PBANKA_131020		conserved Plasmodium protein, unknown function, fragment	0	0	0	0	0	0	6	3	5	3	0	0	0	0	0	0	0	0
PBANKA_132040		conserved Plasmodium protein, unknown function	0	2	2	0	0	0	0	3	4	0	6	0	0	0	0	0	0	0
PBANKA_136530		conserved Plasmodium protein, unknown function	0	0	0	0	0	0	5	3	6	0	3	0	0	0	0	0	0	0
PBANKA_142780		peptidase family C50, putative	0	7	3	3	0	3	0	0	0	0	0	0	0	0	0	0	0	0
PBANKA_061790		ferrodoxin reductase-like protein, putative	0	0	0	0	0	0	0	0	0	0	0	0	0	0	5	2	0	9
PBANKA_030500	SERA2	serine repeat antigen 2 (SERA2)	0	0	0	0	0	0	0	0	0	0	0	0	0	0	0	0	0	16
PBANKA_010490		RNA-binding protein, putative	0	0	0	0	0	0	4	4	5	0	3	0	0	0	0	0	0	0
PBANKA_020930	ARP1	actin-related protein (ARP1)	0	2	0	0	0	0	5	0	5	0	4	0	0	0	0	0	0	0
PBANKA_031050		conserved Plasmodium protein, unknown function	0	0	0	0	0	0	6	3	3	0	4	0	0	0	0	0	0	0
PBANKA_062140		conserved Plasmodium protein, unknown function	0	2	0	0	0	0	0	4	6	0	4	0	0	0	0	0	0	0
PBANKA_090230		conserved Plasmodium protein, unknown function, fragment	0	0	0	0	0	0	10	0	6	0	0	0	0	0	0	0	0	0
PBANKA_093470		conserved Plasmodium protein, unknown function	0	2	0	0	0	0	6	5	3	0	0	0	0	0	0	0	0	0
PBANKA_114410		RNAse L inhibitor protein, putative	0	0	0	0	0	0	4	4	3	0	5	0	0	0	0	0	0	0
PBANKA_120080		RNA-binding protein, putative	0	2	0	0	0	0	3	4	3	4	0	0	0	0	0	0	0	0
PBANKA_120260		E3 ubiquitin-protein ligase, putative	0	4	2	0	0	0	3	4	3	0	0	0	0	0	0	0	0	0
PBANKA_140780	PRPF3	U4/U6 small nuclear ribonucleoprotein PRP3, putative (PRPF3)	0	0	0	0	0	0	5	4	3	4	0	0	0	0	0	0	0	0
PBANKA_144820		asparagine/aspartate rich protein, putative	0	2	0	0	0	0	3	0	5	0	6	0	0	0	0	0	0	0
PBANKA_145480		RNA-binding protein, putative	0	0	0	0	0	0	4	3	5	0	4	0	0	0	0	0	0	0
PBANKA_072200		phosphatidylinositol 4-kinase, putative	0	0	0	0	0	0	0	0	0	3	0	0	0	0	0	6	6	0
PBANKA_092000		multiprotein bridging factor type 1, putative	0	2	0	0	0	0	4	0	0	0	0	0	0	0	0	2	0	7
PBANKA_010920	SPT5	transcription elongation factor SPT5, putative (SPT5)	0	0	0	0	0	0	5	0	5	0	5	0	0	0	0	0	0	0
PBANKA_050220		26S proteasome regulatory subunit p55, putative	0	4	0	2	0	2	0	0	4	0	3	0	0	0	0	0	0	0
PBANKA_071560		26S proteasome AAA-ATPase subunit RPT3, putative	0	0	0	0	0	0	3	3	3	0	4	2	0	0	0	0	0	0
PBANKA_071970		conserved Plasmodium protein, unknown function	0	0	0	0	0	0	7	4	0	0	4	0	0	0	0	0	0	0
PBANKA_083680	EMAP1	erythrocyte membrane associated protein 1 (EMAP1)	0	0	0	0	0	0	0	5	5	0	5	0	0	0	0	0	0	0
PBANKA_093300	CLK3	serine/threonine protein kinase, putative (CLK3)	0	0	0	0	0	0	4	5	6	0	0	0	0	0	0	0	0	0
PBANKA_102350		conserved Plasmodium protein, unknown function	0	0	0	0	0	0	3	0	7	0	5	0	0	0	0	0	0	0
PBANKA_113050		proteasome subunit alpha type-7, putative	0	4	2	2	0	0	0	0	0	0	4	0	0	0	0	0	0	3
PBANKA_124250		RNA helicase, putative	0	0	0	0	0	0	6	3	6	0	0	0	0	0	0	0	0	0
PBANKA_131550		sortilin, putative	0	0	0	0	0	0	5	3	0	3	0	2	0	0	0	0	0	2
PBANKA_141500	PRP40	pre-mRNA-processing factor 40, putative (PRP40)	0	0	0	0	0	0	4	4	4	3	0	0	0	0	0	0	0	0
PBANKA_010870		conserved Plasmodium protein, unknown function	0	2	2	0	0	2	3	0	5	0	0	0	0	0	0	0	0	0
PBANKA_040770		60S acidic ribosomal protein P2, putative	0	3	3	0	0	2	0	0	0	0	0	6	0	0	0	0	0	0
PBANKA_041430		conserved Plasmodium protein, unknown function	0	3	2	0	0	0	3	3	0	0	3	0	0	0	0	0	0	0
PBANKA_052310		eukaryotic initiation factor, putative	0	0	0	0	0	0	4	5	5	0	0	0	0	0	0	0	0	0
PBANKA_091960	NOT2	CCR4-NOT transcription complex subunit 2, putative (NOT2)	0	0	0	0	0	0	5	5	0	4	0	0	0	0	0	0	0	0
PBANKA_100800		conserved Plasmodium protein, unknown function	0	0	0	0	0	0	4	4	3	0	3	0	0	0	0	0	0	0
PBANKA_110730	NPL4	nuclear protein localization protein 4, putative (NPL4)	0	3	3	0	0	0	0	4	0	0	4	0	0	0	0	0	0	0
PBANKA_130600	RPA3	replication factor A protein 3, putative (RPA3)	0	3	3	0	0	2	0	0	4	0	0	0	0	0	0	0	0	2
PBANKA_132480		conserved Plasmodium protein, unknown function	0	0	0	0	0	0	3	3	4	0	4	0	0	0	0	0	0	0
PBANKA_020160	ETRAMP	early transcribed membrane protein (ETRAMP)	0	0	0	0	0	0	0	0	0	0	0	3	0	0	2	4	0	4
PBANKA_090500	RPS21	40S ribosomal protein S21, putative (RPS21)	0	2	0	0	0	0	0	0	0	0	0	0	0	0	4	3	0	4
PBANKA_131270	GEST	gamete egress and sporozoite traversal protein (GEST)	0	0	0	0	0	0	0	4	0	0	0	3	0	0	2	2	0	2
PBANKA_021040	PMS1	DNA mismatch repair protein PMS1, putative (PMS1)	0	0	0	0	0	0	4	4	5	0	0	0	0	0	0	0	0	0
PBANKA_021150		proteasome subunit alpha type-5, putative	0	0	0	0	0	0	0	0	3	0	0	3	0	0	3	0	0	4
PBANKA_040160	NSF	N-ethylmaleimide-sensitive fusion protein, putative (NSF)	0	0	0	0	0	0	0	4	5	0	4	0	0	0	0	0	0	0
PBANKA_060120		dynein heavy chain, putative	0	0	0	0	0	0	5	5	3	0	0	0	0	0	0	0	0	0
PBANKA_071720		conserved Plasmodium protein, unknown function	0	0	0	0	0	0	3	4	3	0	3	0	0	0	0	0	0	0
PBANKA_071930	DHFR-TS	bifunctional dihydrofolate reductase-thymidylate synthase, putative (DHFR-TS)	0	0	0	0	0	0	4	0	0	0	4	0	0	0	0	0	0	5
PBANKA_082470	TRXR	thioredoxin reductase, putative (TRXR)	0	0	0	2	0	0	0	0	0	0	0	3	0	0	4	0	0	4
PBANKA_090390		coatomer subunit gamma, putative	0	0	0	0	0	0	4	0	5	0	4	0	0	0	0	0	0	0
PBANKA_092980		insulinase, putative	0	0	0	0	0	0	0	3	5	0	5	0	0	0	0	0	0	0
PBANKA_103510	NOP1	fibrillarin, putative (NOP1)	0	2	0	2	0	2	0	3	4	0	0	0	0	0	0	0	0	0
PBANKA_121420		ribonucleotide reductase small subunit, putative	0	0	0	0	0	2	0	0	0	0	0	3	0	0	3	0	0	5
PBANKA_132120	VPS4	vacuolar protein sorting-associated protein 4, putative (VPS4)	0	0	0	0	0	0	4	4	5	0	0	0	0	0	0	0	0	0
PBANKA_132270		ATP-dependent RNA helicase DBP5, putative	0	0	0	0	0	0	4	0	4	0	5	0	0	0	0	0	0	0
PBANKA_133000		conserved Plasmodium protein, unknown function	0	0	0	0	0	0	5	5	0	3	0	0	0	0	0	0	0	0
PBANKA_133030		rhoptry protein, putative	0	0	0	0	0	0	5	3	5	0	0	0	0	0	0	0	0	0
PBANKA_134580		conserved Plasmodium protein, unknown function	0	0	0	0	0	0	0	0	0	0	0	7	0	6	0	0	0	0
PBANKA_140380		conserved Plasmodium protein, unknown function	0	0	0	0	0	0	3	0	6	0	4	0	0	0	0	0	0	0
PBANKA_136520		thioredoxin-related protein, putative	0	0	0	0	0	0	0	0	0	0	0	3	0	0	3	2	0	4
PBANKA_040310	GLP1	1-cys-glutaredoxin-like protein-1, putative (GLP1)	0	0	0	0	0	0	0	0	0	0	0	0	0	0	5	0	0	7
PBANKA_011020		lsm12, putative	0	0	0	0	0	0	5	0	3	4	0	0	0	0	0	0	0	0
PBANKA_030700		60S ribosomal protein L37ae, putative	0	2	2	2	0	0	0	3	0	0	0	3	0	0	0	0	0	0
PBANKA_031380		ATP synthase F1, alpha subunit, putative	0	0	0	0	0	0	0	3	5	0	4	0	0	0	0	0	0	0
PBANKA_051660	LRR1	leucine-rich repeat protein (LRR1)	0	3	0	0	0	0	0	4	3	0	0	0	0	0	0	0	0	2
PBANKA_082170		inosine-5'-monophosphate dehydrogenase, putative	0	0	0	0	0	0	0	0	0	0	0	0	0	0	7	0	0	5
PBANKA_083310	M18AAP	M18 aspartyl aminopeptidase, putative (M18AAP)	0	0	0	0	0	0	0	3	3	0	4	0	0	0	0	0	0	2
PBANKA_102470		ubiquitin fusion degradation protein UFD1, putative	0	0	0	0	0	0	3	3	3	0	3	0	0	0	0	0	0	0
PBANKA_121110	NIF4	NLI interacting factor-like phosphatase (NIF4)	0	0	0	0	0	0	4	0	0	3	5	0	0	0	0	0	0	0
PBANKA_130450	SOC3	conserved Plasmodium protein, unknown function	0	2	0	0	0	0	7	0	0	0	3	0	0	0	0	0	0	0
PBANKA_134420		conserved Plasmodium protein, unknown function	0	3	0	0	0	0	5	4	0	0	0	0	0	0	0	0	0	0
PBANKA_135520		aconitate hydratase, putative	0	0	0	0	0	0	4	0	0	0	0	0	0	0	3	0	0	5
PBANKA_135550	CK2beta2	casein kinase II beta chain, putative (CK2beta2)	0	2	2	0	0	2	3	0	0	3	0	0	0	0	0	0	0	0
PBANKA_135930		conserved Plasmodium protein, unknown function	0	0	0	0	0	0	3	5	4	0	0	0	0	0	0	0	0	0
PBANKA_140250		conserved Plasmodium protein, unknown function	0	0	0	0	0	0	3	0	5	0	4	0	0	0	0	0	0	0
PBANKA_142620	CAF1	CCR4-associated factor 1, putative (CAF1)	0	0	0	0	0	0	4	5	3	0	0	0	0	0	0	0	0	0
PBANKA_145580		GAS8-like protein, putative	0	0	0	0	0	0	3	4	5	0	0	0	0	0	0	0	0	0
PBANKA_103550	VPS29	vacuolar protein sorting-associated protein 29, putative (VPS29)	0	0	0	0	0	0	0	0	0	0	0	0	0	0	3	0	0	8
PBANKA_010550	GLP2	glutaredoxin-like protein (GLP2)	0	0	0	0	0	0	0	0	4	0	3	0	0	0	0	0	0	4
PBANKA_040620		conserved Plasmodium protein, unknown function	0	0	0	0	0	0	4	4	3	0	0	0	0	0	0	0	0	0
PBANKA_060320	EIF5A	eukaryotic translation initiation factor 5A, putative (EIF5A)	0	2	0	0	0	0	4	5	0	0	0	0	0	0	0	0	0	0
PBANKA_060560		conserved Plasmodium protein, unknown function	0	0	0	0	0	0	5	0	6	0	0	0	0	0	0	0	0	0
PBANKA_071090	LSM3	U6 snRNA-associated Sm-like protein LSm3, putative (LSM3)	0	0	0	0	0	0	3	4	4	0	0	0	0	0	0	0	0	0
PBANKA_092280	SNRPD1	small nuclear ribonucleoprotein Sm D1, putative (SNRPD1)	0	2	0	0	0	0	0	5	4	0	0	0	0	0	0	0	0	0
PBANKA_092440		splicing factor, putative	2	2	2	2	0	3	0	0	0	0	0	0	0	0	0	0	0	0
PBANKA_093740	PRPF6	pre-mRNA-processing factor 6, putative (PRPF6)	0	0	0	0	0	0	3	0	0	4	4	0	0	0	0	0	0	0
PBANKA_100400		cytosolic glyoxalase II, putative	0	0	0	0	0	0	3	0	3	0	0	0	0	0	0	0	0	5
PBANKA_103890		conserved Plasmodium protein, unknown function	0	2	0	0	0	0	0	4	5	0	0	0	0	0	0	0	0	0
PBANKA_121890		elongation factor 1 (EF-1), putative	0	0	0	0	0	0	3	5	3	0	0	0	0	0	0	0	0	0
PBANKA_122660		tubulin gamma chain, putative	0	4	0	4	0	3	0	0	0	0	0	0	0	0	0	0	0	0
PBANKA_142110		transcription elongation factor s-II, putative	0	7	0	2	0	2	0	0	0	0	0	0	0	0	0	0	0	0
PBANKA_142650	CUL1	cullin-1, putative (CUL1)	0	2	0	0	0	2	3	4	0	0	0	0	0	0	0	0	0	0
PBANKA_142940		dynein light chain 1, putative	0	0	0	0	0	0	4	4	0	0	3	0	0	0	0	0	0	0
PBANKA_145070		clustered-asparagine-rich protein, putative	0	0	0	0	0	0	5	6	0	0	0	0	0	0	0	0	0	0
PBANKA_145900		conserved Plasmodium protein, unknown function	0	0	0	0	0	0	0	0	0	0	0	0	0	0	0	4	0	6
PBANKA_020630	CEN1	centrin-1, putative (CEN1)	0	2	0	0	0	2	3	0	3	0	0	0	0	0	0	0	0	0
PBANKA_070730	GCN5	histone acetyltransferase GCN5, putative (GCN5)	0	0	0	0	0	0	0	0	5	0	5	0	0	0	0	0	0	0
PBANKA_082290		conserved Plasmodium protein, unknown function	0	0	0	0	0	0	3	3	4	0	0	0	0	0	0	0	0	0
PBANKA_093420	DSK2	ubiquitin domain-containing protein DSK2, putative (DSK2)	0	0	0	0	0	0	0	0	7	0	3	0	0	0	0	0	0	0
PBANKA_094240		conserved Plasmodium protein, unknown function	0	0	0	0	0	0	6	0	4	0	0	0	0	0	0	0	0	0
PBANKA_094360		60S acidic ribosomal protein P1, putative	0	2	0	0	0	0	0	0	0	0	0	4	0	0	2	0	0	2
PBANKA_101840	PRMT1	arginine methyltransferase 1, putative (PRMT1)	0	0	0	0	0	0	3	3	0	4	0	0	0	0	0	0	0	0
PBANKA_102390	GST	glutathione S-transferase, putative (GST)	0	0	0	0	0	0	0	0	3	3	0	2	0	0	0	0	0	2
PBANKA_122290	RPN10	26S proteasome regulatory subunit RPN10, putative (RPN10)	0	0	0	0	0	0	0	3	3	0	0	0	0	0	0	0	0	4
PBANKA_123080	PDXK	pyridoxal kinase, putative (PDXK)	0	0	0	0	0	0	0	0	0	0	0	0	0	0	4	0	0	6
PBANKA_130500		conserved Plasmodium protein, unknown function	0	0	0	0	0	0	0	0	0	0	0	7	0	0	0	0	0	3
PBANKA_130950		conserved Plasmodium protein, unknown function	0	0	0	0	0	0	3	3	0	0	4	0	0	0	0	0	0	0
PBANKA_143150		conserved Plasmodium protein, unknown function	0	2	2	0	0	3	0	3	0	0	0	0	0	0	0	0	0	0
PBANKA_020720		vacuolar ATP synthase subunit c, putative	0	0	0	0	0	0	5	0	0	0	0	0	0	0	2	0	0	2
PBANKA_021130	NFS	cysteine desulfurase, putative (NFS)	0	0	0	0	0	0	0	0	0	0	0	0	0	0	4	0	0	5
PBANKA_040600		conserved Plasmodium protein, unknown function	0	3	0	0	0	0	3	0	3	0	0	0	0	0	0	0	0	0
PBANKA_041580		conserved Plasmodium protein, unknown function	0	0	0	0	0	0	3	6	0	0	0	0	0	0	0	0	0	0
PBANKA_050660	SRSF4	serine/arginine-rich splicing factor 4, putative (SRSF4)	0	3	0	0	0	0	0	3	0	3	0	0	0	0	0	0	0	0
PBANKA_051720	HAD1	haloacid dehalogenase-like hydrolase, putative (HAD1)	0	0	0	0	0	0	3	3	3	0	0	0	0	0	0	0	0	0
PBANKA_092770		conserved Plasmodium protein, unknown function	0	0	0	0	0	0	3	6	0	0	0	0	0	0	0	0	0	0
PBANKA_093840		endoplasmic reticulum-resident calcium binding protein, putative	0	0	0	0	0	0	0	0	0	0	0	4	0	0	0	0	0	5
PBANKA_113690	PIAS	E3 SUMO-protein ligase PIAS, putative (PIAS)	0	2	0	0	0	0	0	3	4	0	0	0	0	0	0	0	0	0
PBANKA_120720	AK1	adenylate kinase, putative (AK1)	0	0	0	0	0	0	0	0	0	0	0	0	0	0	3	0	0	6
PBANKA_140680	RPS27	40S ribosomal protein S27, putative (RPS27)	0	0	0	0	0	0	0	0	0	0	0	0	0	0	0	3	0	5
PBANKA_111540		BolA-like protein, putative	0	0	0	0	0	0	0	0	0	0	0	0	0	0	2	2	0	4
PBANKA_010710		proteasome subunit alpha type-2, putative	0	2	0	0	0	0	0	0	0	0	0	3	0	0	0	0	0	3
PBANKA_031520	SNRPD2	small nuclear ribonucleoprotein Sm D2, putative (SNRPD2)	0	3	2	0	0	3	0	0	0	0	0	0	0	0	0	0	0	0
PBANKA_041130		conserved Plasmodium protein, unknown function	0	0	0	0	0	0	5	3	0	0	0	0	0	0	0	0	0	0
PBANKA_061050	TPx(Gl)	glutathione peroxidase-like thioredoxin peroxidase (TPx(Gl))	0	0	0	0	0	0	0	0	0	0	0	0	0	0	2	0	0	6
PBANKA_071420	ClpB1	chaperone protein ClpB1, putative (ClpB1)	0	0	0	0	0	0	0	5	3	0	0	0	0	0	0	0	0	0
PBANKA_071730	CRK3	cdc2-related protein kinase 3 (CRK3)	0	0	0	0	0	0	4	4	0	0	0	0	0	0	0	0	0	0
PBANKA_082710		protein kinase, putative	0	3	0	0	0	2	0	0	0	0	3	0	0	0	0	0	0	0
PBANKA_092720		conserved Plasmodium protein, unknown function	0	0	0	0	0	0	3	0	5	0	0	0	0	0	0	0	0	0
PBANKA_101150		conserved Plasmodium protein, unknown function	0	0	0	0	0	0	5	0	0	0	3	0	0	0	0	0	0	0
PBANKA_103380		conserved Plasmodium protein, unknown function	0	0	0	0	0	0	4	4	0	0	0	0	0	0	0	0	0	0
PBANKA_110720	CAF40	cell differentiation protein, putative (CAF40)	0	0	0	0	0	0	0	5	3	0	0	0	0	0	0	0	0	0
PBANKA_110830	PRP5	pre-mRNA-processing ATP-dependent RNA helicase PRP5, putative (PRP5)	0	0	0	0	0	0	4	0	4	0	0	0	0	0	0	0	0	0
PBANKA_133670		conserved Plasmodium protein, unknown function	0	0	0	0	0	0	0	4	4	0	0	0	0	0	0	0	0	0
PBANKA_134030		phosphoribosylpyrophosphate synthetase, putative	0	0	0	0	0	0	0	0	0	0	0	0	0	0	8	0	0	0
PBANKA_142830		conserved Plasmodium protein, unknown function	0	0	0	0	0	0	4	4	0	0	0	0	0	0	0	0	0	0
PBANKA_052430		tryptophan/threonine-rich antigen, putative	0	0	0	0	0	0	0	0	0	0	0	3	0	0	0	2	0	2
PBANKA_143080	Trx-Px2	thioredoxin peroxidase 2, putative (Trx-Px2)	0	0	0	0	0	0	0	0	0	0	0	0	0	0	2	2	0	3
PBANKA_051280	MTRAP	merozoite TRAP-like protein, putative (MTRAP)	0	0	0	0	0	0	0	0	0	0	0	0	0	0	0	0	0	7
PBANKA_081440		conserved Plasmodium protein, unknown function	0	0	0	0	0	0	0	0	0	0	0	0	0	0	0	0	0	7
PBANKA_093130	DPAP1	dipeptidyl aminopeptidase 1, putative (DPAP1)	0	0	0	0	0	0	0	0	0	0	0	0	0	0	0	0	0	7
PBANKA_094110		conserved Plasmodium protein, unknown function	0	0	0	0	0	0	0	0	0	0	0	0	0	0	0	0	0	7
PBANKA_104010	CK	choline kinase (CK)	0	0	0	0	0	0	0	0	0	0	0	0	0	0	0	0	0	7
PBANKA_113260		ubiquitin-conjugating enzyme, putative	0	0	0	0	0	0	0	0	0	0	0	0	0	0	0	0	0	7
PBANKA_030910		peptide chain release factor subunit 1, putative	0	0	0	0	0	0	4	0	0	0	3	0	0	0	0	0	0	0
PBANKA_031460		conserved Plasmodium protein, unknown function	0	0	0	0	0	0	0	0	0	0	0	0	0	0	3	0	0	4
PBANKA_040430		P-loop containing nucleoside triphosphate hydrolase, putative	0	0	0	0	0	0	4	0	3	0	0	0	0	0	0	0	0	0
PBANKA_061890		conserved Plasmodium protein, unknown function	0	2	0	0	0	0	3	0	0	0	0	0	0	0	0	0	0	2
PBANKA_070910		60S ribosomal protein L22, putative	0	0	0	0	0	2	0	0	0	0	0	2	0	3	0	0	0	0
PBANKA_082840		conserved Plasmodium protein, unknown function	0	0	0	0	0	0	3	4	0	0	0	0	0	0	0	0	0	0
PBANKA_083260		proteasome subunit beta type-6, putative	0	0	0	0	0	0	0	3	4	0	0	0	0	0	0	0	0	0
PBANKA_092360	MGE1	GrpE protein homolog, mitochondrial, putative (MGE1)	0	0	0	0	0	0	0	0	0	0	0	0	0	0	4	0	0	3
PBANKA_092820		conserved Plasmodium protein, unknown function	0	0	0	0	0	0	4	0	0	0	3	0	0	0	0	0	0	0
PBANKA_093090	UCH54	deubiquinating/deneddylating enzyme, putative (UCH54)	0	0	0	0	0	0	0	0	3	0	0	0	0	0	0	0	0	4
PBANKA_101030		dynein-related AAA-type ATPase, putative	0	0	0	0	0	0	0	0	3	0	4	0	0	0	0	0	0	0
PBANKA_101310		60S ribosomal protein L14, putative	0	2	0	0	0	0	0	0	0	0	0	5	0	0	0	0	0	0
PBANKA_102340	GR	glutathione reductase, putative (GR)	0	0	0	0	0	0	4	0	0	0	3	0	0	0	0	0	0	0
PBANKA_122020		lysophospholipase, putative	0	0	0	0	0	0	0	0	3	0	4	0	0	0	0	0	0	0
PBANKA_122820	GDH3	glutamate dehydrogenase, putative (GDH3)	0	0	0	0	0	0	0	0	0	4	0	0	0	0	0	0	0	3
PBANKA_142070		conserved Plasmodium protein, unknown function	0	0	0	0	0	0	4	0	3	0	0	0	0	0	0	0	0	0
PBANKA_146270	THO2	THO complex subunit 2, putative (THO2)	0	0	0	0	0	0	4	0	3	0	0	0	0	0	0	0	0	0
PBANKA_040460	AHA1	activator of Hsp90 ATPase, putative (AHA1)	0	0	0	0	0	0	0	0	3	0	0	0	0	0	0	0	0	3
PBANKA_060280	UBC	ubiquitin-conjugating enzyme E2, putative (UBC)	0	0	0	0	0	0	0	0	0	0	0	0	0	0	3	0	0	3
PBANKA_070410	UBE4B	ubiquitin conjugation factor E4 B, putative (UBE4B)	0	0	0	0	0	0	0	3	3	0	0	0	0	0	0	0	0	0
PBANKA_071740		coatomer subunit zeta, putative	0	0	0	0	0	0	0	0	0	0	0	0	0	0	0	0	0	6
PBANKA_090450		ubiquitin activating enzyme (E1) subunit Aos1, putative	0	0	0	0	0	0	0	0	4	0	0	0	0	0	0	0	0	2
PBANKA_092960		pre-RNA processing ribonucleoprotein, putative	0	2	2	0	0	2	0	0	0	0	0	0	0	0	0	0	0	0
PBANKA_102580		prefoldin subunit 2, putative	0	0	0	0	0	0	3	0	3	0	0	0	0	0	0	0	0	0
PBANKA_102660		GTP-binding protein, putative	0	0	0	0	0	0	0	0	0	0	0	0	0	0	2	0	0	4
PBANKA_111100		RNA pseudouridylate synthase, putative, fragment	0	0	0	0	0	2	0	4	0	0	0	0	0	0	0	0	0	0
PBANKA_111570		Ndc80 homologue, putative	0	0	0	0	0	0	0	0	3	0	3	0	0	0	0	0	0	0
PBANKA_114300		U1 small nuclear ribonucleoprotein, putative	0	0	0	0	0	0	3	0	0	0	3	0	0	0	0	0	0	0
PBANKA_120490		conserved Plasmodium protein, unknown function	0	0	0	0	0	0	3	3	0	0	0	0	0	0	0	0	0	0
PBANKA_120590	ApiAP2	transcription factor with AP2 domain(s), putative (ApiAP2)	0	0	0	0	0	0	0	3	3	0	0	0	0	0	0	0	0	0
PBANKA_120660		26S protease regulatory subunit 4, putative	0	0	0	0	0	0	0	0	0	0	4	0	0	0	2	0	0	0
PBANKA_123660		conserved Plasmodium protein, unknown function, fragment	0	0	0	0	0	0	3	0	3	0	0	0	0	0	0	0	0	0
PBANKA_130170	SF3A1	splicing factor 3A subunit 1, putative (SF3A1)	0	0	0	0	0	0	0	0	0	3	3	0	0	0	0	0	0	0
PBANKA_133840		vacuolar ATP synthase subunit g, putative	0	0	0	0	0	0	0	0	0	0	0	0	0	0	3	0	0	3
PBANKA_135670		kelch protein K13, putative	0	0	0	0	0	0	0	3	0	0	3	0	0	0	0	0	0	0
PBANKA_136180		conserved Plasmodium protein, unknown function	0	0	0	0	0	0	0	3	0	3	0	0	0	0	0	0	0	0
PBANKA_140990		AP-1 complex subunit mu, putative	0	0	0	0	0	0	0	3	3	0	0	0	0	0	0	0	0	0
PBANKA_143620	SET10	histone-lysine N-methyltransferase, H3 lysine-4 specific, putative (SET10)	0	0	0	0	0	0	0	0	6	0	0	0	0	0	0	0	0	0
PBANKA_144510	ClpQ	ATP-dependent protease subunit ClpQ, putative (ClpQ)	0	0	0	0	0	0	0	0	0	0	0	0	0	0	3	0	0	3
PBANKA_145300		conserved Plasmodium protein, unknown function	0	0	0	0	0	0	3	0	3	0	0	0	0	0	0	0	0	0
PBANKA_114590		conserved rodent malaria protein, unknown function	0	0	0	0	0	0	0	0	0	0	0	0	0	0	0	0	3	2
PBANKA_010420		calcium-binding protein, putative	0	0	0	0	0	0	0	5	0	0	0	0	0	0	0	0	0	0
PBANKA_030230		aspartate aminotransferase, putative	0	0	0	0	0	0	0	0	0	0	0	0	0	0	0	0	0	5
PBANKA_031180		long-chain acyl-CoA synthase, putative	0	0	0	0	0	0	0	5	0	0	0	0	0	0	0	0	0	0
PBANKA_050930		glutamine--fructose-6-phosphate aminotransferase [isomerizing], putative	0	2	0	0	0	0	0	0	3	0	0	0	0	0	0	0	0	0
PBANKA_071750		nuclear cap-binding protein, putative	0	0	0	0	0	0	0	0	5	0	0	0	0	0	0	0	0	0
PBANKA_080910		subunit of proteaseome activator complex, putative	0	0	0	0	0	0	0	0	0	0	0	0	0	0	2	0	0	3
PBANKA_083440	MAS1	mitochondrial-processing peptidase subunit beta, putative (MAS1)	0	0	0	0	0	0	0	0	0	0	0	0	0	0	2	0	0	3
PBANKA_092550	CDPK6	calcium-dependent protein kinase 6 (CDPK6)	0	0	0	5	0	0	0	0	0	0	0	0	0	0	0	0	0	0
PBANKA_092780		tRNA nucleotidyltransferase, putative	0	2	0	0	0	0	0	3	0	0	0	0	0	0	0	0	0	0
PBANKA_112200		coronin binding protein, putative	0	0	0	0	0	0	0	0	5	0	0	0	0	0	0	0	0	0
PBANKA_113110	ADSS	adenylosuccinate synthetase, putative (ADSS)	0	0	0	0	0	0	0	0	0	3	0	0	0	0	0	0	0	2
PBANKA_120370		regulator of nonsense transcripts, putative	0	0	0	0	0	0	0	5	0	0	0	0	0	0	0	0	0	0
PBANKA_120480	PhLP1	phosducin-like protein, putative (PhLP1)	0	0	0	0	0	0	0	0	0	0	0	0	0	0	0	0	0	5
PBANKA_120850		conserved Plasmodium protein, unknown function	0	3	0	0	0	2	0	0	0	0	0	0	0	0	0	0	0	0
PBANKA_123330	DDX23	ATP-dependent RNA helicase DDX23, putative (DDX23)	0	0	0	0	0	0	5	0	0	0	0	0	0	0	0	0	0	0
PBANKA_123840		conserved Plasmodium protein, unknown function	0	2	0	0	0	0	0	0	0	3	0	0	0	0	0	0	0	0
PBANKA_131890		methyltransferase, putative	0	0	0	0	0	0	0	0	0	0	0	0	0	0	2	0	0	3
PBANKA_135870		conserved Plasmodium protein, unknown function	0	3	0	0	0	2	0	0	0	0	0	0	0	0	0	0	0	0
PBANKA_142750		acyl-CoA binding protein, putative	0	3	0	0	0	0	0	0	0	0	0	0	0	0	0	0	0	2
PBANKA_143140		conserved Plasmodium protein, unknown function	0	0	0	0	0	0	5	0	0	0	0	0	0	0	0	0	0	0
PBANKA_145780	ARFGAP	ADP-ribosylation factor GTPase-activating protein, putative (ARFGAP)	0	0	0	0	0	0	0	0	0	0	0	3	0	0	0	0	0	2
PBANKA_145890		clathrin coat assembly protein AP180, putative	0	2	3	0	0	0	0	0	0	0	0	0	0	0	0	0	0	0
PBANKA_146160		conserved Plasmodium protein, unknown function	0	0	0	0	0	0	5	0	0	0	0	0	0	0	0	0	0	0
PBANKA_081160		selenophosphate synthetase, putative	0	0	0	0	0	0	0	0	0	0	0	0	0	0	0	2	0	2
PBANKA_010440		nucleoside diphosphate kinase, putative	0	0	0	0	0	0	4	0	0	0	0	0	0	0	0	0	0	0
PBANKA_040140		conserved Plasmodium protein, unknown function	0	0	0	0	0	0	0	0	4	0	0	0	0	0	0	0	0	0
PBANKA_040830		phd finger protein, putative	0	0	0	0	0	0	0	0	0	0	4	0	0	0	0	0	0	0
PBANKA_041730		AP-4 complex subunit epsilon, putative	0	0	0	0	0	0	4	0	0	0	0	0	0	0	0	0	0	0
PBANKA_050540		conserved Plasmodium protein, unknown function	0	0	0	0	0	0	0	4	0	0	0	0	0	0	0	0	0	0
PBANKA_071520		eukaryotic translation initiation factor, putative	0	0	0	0	0	0	4	0	0	0	0	0	0	0	0	0	0	0
PBANKA_072000		conserved Plasmodium protein, unknown function	0	0	0	0	0	0	4	0	0	0	0	0	0	0	0	0	0	0
PBANKA_072170		ran binding protein 1, putative	0	2	0	0	0	0	0	0	0	0	0	0	0	0	0	0	0	2
PBANKA_081090		FHA domain protein, putative	0	0	0	0	0	0	4	0	0	0	0	0	0	0	0	0	0	0
PBANKA_082650	HDAC1	histone deacetylase, putative (HDAC1)	0	0	0	0	0	0	4	0	0	0	0	0	0	0	0	0	0	0
PBANKA_083380		mRNA processing protein, putative	0	0	0	0	0	0	0	0	0	0	4	0	0	0	0	0	0	0
PBANKA_091900	RPN7	26S proteasome regulatory subunit RPN7, putative (RPN7)	0	2	0	2	0	0	0	0	0	0	0	0	0	0	0	0	0	0
PBANKA_093710	VPS35	vacuolar protein sorting-associated protein 35, putative (VPS35)	0	0	0	0	0	0	0	0	0	0	4	0	0	0	0	0	0	0
PBANKA_101000		mitochondrial acidic protein MAM33, putative	0	0	0	0	0	0	0	0	0	0	0	0	0	0	2	0	0	2
PBANKA_102460	LISP1	liver specific protein 1 (LISP1)	0	0	0	0	0	0	4	0	0	0	0	0	0	0	0	0	0	0
PBANKA_103220		conserved Plasmodium protein, unknown function	0	0	0	0	0	0	0	0	4	0	0	0	0	0	0	0	0	0
PBANKA_110800		transcription factor IIb, putative	0	0	0	0	0	0	0	0	0	0	0	0	0	0	2	0	0	2
PBANKA_113310	ARK3	serine/threonine protein kinase, putative (ARK3)	0	2	2	0	0	0	0	0	0	0	0	0	0	0	0	0	0	0
PBANKA_114400	RPN11	26S proteasome regulatory subunit RPN11, putative (RPN11)	0	0	2	0	0	0	0	0	0	0	0	0	0	0	0	0	0	2
PBANKA_122350		RNA helicase, putative	0	0	0	4	0	0	0	0	0	0	0	0	0	0	0	0	0	0
PBANKA_132510		conserved Plasmodium protein, unknown function	0	0	0	0	0	0	4	0	0	0	0	0	0	0	0	0	0	0
PBANKA_133610		dihydroorotase, putative	0	0	0	0	0	0	0	0	0	0	0	0	0	0	0	0	0	4
PBANKA_135240		conserved Plasmodium protein, unknown function	0	0	0	0	0	0	4	0	0	0	0	0	0	0	0	0	0	0
PBANKA_141390		zinc finger (CCCH type) protein, putative	0	0	0	0	0	0	0	0	4	0	0	0	0	0	0	0	0	0
PBANKA_143105	CPN10	10 kDa chaperonin, putative (CPN10)	0	0	0	0	0	0	0	0	0	0	0	0	0	0	2	0	0	2
PBANKA_143240	PLP2	perforin-like protein 2 (PLP2)	0	0	0	0	0	0	0	0	0	0	0	0	0	0	0	0	0	4
PBANKA_143350		conserved protein, unknown function	0	0	0	0	0	0	0	4	0	0	0	0	0	0	0	0	0	0
PBANKA_144630	PRP2	pre-mRNA-splicing factor ATP-dependent RNA helicase PRP2, putative (PRP2)	0	0	0	0	0	0	0	4	0	0	0	0	0	0	0	0	0	0
PBANKA_020290		transcription initiation factor TFIIB, putative	0	0	0	0	0	0	0	0	3	0	0	0	0	0	0	0	0	0
PBANKA_020800	C-CAP	cyclase-associated protein (C-CAP)	0	0	0	0	0	0	0	0	0	0	0	0	0	0	0	0	0	3
PBANKA_031280		conserved Plasmodium protein, unknown function	0	0	0	0	0	0	0	0	0	3	0	0	0	0	0	0	0	0
PBANKA_040640		conserved Plasmodium protein, unknown function	0	0	0	0	0	0	0	0	3	0	0	0	0	0	0	0	0	0
PBANKA_041790		conserved Plasmodium protein, unknown function	0	0	0	0	0	0	3	0	0	0	0	0	0	0	0	0	0	0
PBANKA_052260		erythrocyte membrane-associated antigen, putative	0	0	0	0	0	0	0	0	3	0	0	0	0	0	0	0	0	0
PBANKA_052420		early transcribed membrane protein,small exported protein (SEP2)	0	0	0	0	0	0	0	0	3	0	0	0	0	0	0	0	0	0
PBANKA_060160		conserved protein, unknown function	0	0	0	0	0	0	0	0	0	0	3	0	0	0	0	0	0	0
PBANKA_061990		GTP-binding protein, putative	0	0	0	0	0	0	3	0	0	0	0	0	0	0	0	0	0	0
PBANKA_062090		conserved Plasmodium protein, unknown function	0	0	0	0	0	0	0	0	3	0	0	0	0	0	0	0	0	0
PBANKA_070240		conserved Plasmodium protein, unknown function	0	0	0	0	0	0	0	0	0	3	0	0	0	0	0	0	0	0
PBANKA_070810	DLC1	dynein light chain 1 (DLC1)	0	0	0	0	0	0	0	3	0	0	0	0	0	0	0	0	0	0
PBANKA_070920		clp1-related protein, putative	0	0	0	0	0	0	0	0	3	0	0	0	0	0	0	0	0	0
PBANKA_071100		conserved Plasmodium protein, unknown function	0	0	0	0	0	0	3	0	0	0	0	0	0	0	0	0	0	0
PBANKA_072010		conserved Plasmodium protein, unknown function	0	0	0	0	0	0	3	0	0	0	0	0	0	0	0	0	0	0
PBANKA_080670		conserved Plasmodium protein, unknown function	0	0	0	0	0	0	0	0	0	0	3	0	0	0	0	0	0	0
PBANKA_080750		conserved Plasmodium protein, unknown function	0	3	0	0	0	0	0	0	0	0	0	0	0	0	0	0	0	0
PBANKA_082180	PRP24	U4/U6 snRNA-associated-splicing factor, putative (PRP24)	0	0	0	0	0	0	3	0	0	0	0	0	0	0	0	0	0	0
PBANKA_082670		conserved Plasmodium protein, unknown function	0	0	0	0	0	0	0	0	0	0	0	0	0	0	0	0	0	3
PBANKA_083090	LRR8	leucine-rich repeat protein (LRR8)	0	0	0	0	0	0	0	3	0	0	0	0	0	0	0	0	0	0
PBANKA_083560	PKAc	cAMP-dependent protein kinase catalytic subunit (PKAc)	0	0	0	0	0	0	0	0	0	0	0	0	0	0	0	0	0	3
PBANKA_090260	NFYB	CCAAT-box DNA binding protein subunit B, putative (NFYB)	0	0	0	0	0	0	3	0	0	0	0	0	0	0	0	0	0	0
PBANKA_090950		AAA family ATPase, putative	0	0	0	0	0	0	0	0	3	0	0	0	0	0	0	0	0	0
PBANKA_093390		glyoxalase I, putative	0	0	0	0	0	0	3	0	0	0	0	0	0	0	0	0	0	0
PBANKA_094290		phenylalanyl-tRNA synthetase beta chain, putative	0	0	0	0	0	0	3	0	0	0	0	0	0	0	0	0	0	0
PBANKA_094320		casein kinase II beta chain, putative	0	3	0	0	0	0	0	0	0	0	0	0	0	0	0	0	0	0
PBANKA_100770		protein phosphatase 2C, putative	0	0	0	0	0	0	0	0	3	0	0	0	0	0	0	0	0	0
PBANKA_101850		transcription factor 3b, putative	0	0	0	0	0	0	3	0	0	0	0	0	0	0	0	0	0	0
PBANKA_102380		conserved Plasmodium protein, unknown function	0	0	0	0	0	0	0	0	3	0	0	0	0	0	0	0	0	0
PBANKA_103880		conserved Plasmodium protein, unknown function	0	0	0	0	0	0	0	0	0	0	0	0	0	0	0	0	0	3
PBANKA_110710	SUB1	subtilisin-like protease 1 (SUB1)	0	0	0	0	0	0	0	0	0	0	0	0	0	0	0	0	0	3
PBANKA_110900		RNA polymerase I, putative	0	0	0	0	0	0	3	0	0	0	0	0	0	0	0	0	0	0
PBANKA_112680		HECT-domain (ubiquitin-transferase), putative	0	0	0	0	0	0	0	0	0	0	3	0	0	0	0	0	0	0
PBANKA_114210		conserved Plasmodium protein, unknown function	0	0	0	0	0	0	0	0	3	0	0	0	0	0	0	0	0	0
PBANKA_114570		U2 small nuclear ribonucleoprotein A', putative	0	0	0	0	0	0	0	3	0	0	0	0	0	0	0	0	0	0
PBANKA_120180		conserved Plasmodium protein, unknown function	0	3	0	0	0	0	0	0	0	0	0	0	0	0	0	0	0	0
PBANKA_121300	ADA2	transcriptional coactivator ADA2, putative (ADA2)	0	0	0	0	0	0	3	0	0	0	0	0	0	0	0	0	0	0
PBANKA_122830		conserved Plasmodium protein, unknown function	0	0	0	0	0	0	0	0	0	0	3	0	0	0	0	0	0	0
PBANKA_130330		ubiquinol-cytochrome c reductase iron-sulfur subunit, putative	0	0	0	0	0	0	0	0	0	0	0	0	0	0	0	0	0	3
PBANKA_130990		M17 leucyl aminopeptidase, putative	0	0	0	0	0	0	0	0	3	0	0	0	0	0	0	0	0	0
PBANKA_131040	CEN2	centrin-2, putative (CEN2)	0	0	0	0	0	0	0	0	0	0	0	0	0	3	0	0	0	0
PBANKA_131050		conserved Plasmodium protein, unknown function	0	0	0	0	0	0	0	0	3	0	0	0	0	0	0	0	0	0
PBANKA_131160		calponin homology domain-containing protein, putative	0	0	0	0	0	0	0	3	0	0	0	0	0	0	0	0	0	0
PBANKA_132360		biotin protein ligase, putative	0	0	0	0	0	0	0	0	0	0	0	0	0	0	0	0	0	3
PBANKA_132600		conserved Plasmodium protein, unknown function	0	0	0	0	0	0	0	0	3	0	0	0	0	0	0	0	0	0
PBANKA_132610		conserved Plasmodium protein, unknown function	0	0	0	0	0	0	3	0	0	0	0	0	0	0	0	0	0	0
PBANKA_133130		conserved Plasmodium protein, unknown function	0	0	0	0	0	0	3	0	0	0	0	0	0	0	0	0	0	0
PBANKA_134560		elongation factor Tu, putative	0	0	0	0	0	0	0	0	0	0	0	0	0	0	0	0	0	3
PBANKA_135690	PRPF4	U4/U6 small nuclear ribonucleoprotein PRP4, putative (PRPF4)	0	0	0	0	0	0	0	0	3	0	0	0	0	0	0	0	0	0
PBANKA_140290		conserved Plasmodium protein, unknown function	0	0	0	0	0	0	0	0	3	0	0	0	0	0	0	0	0	0
PBANKA_140620		conserved Plasmodium protein, unknown function	0	0	0	0	0	0	0	0	3	0	0	0	0	0	0	0	0	0
PBANKA_140700		conserved Plasmodium protein, unknown function	0	0	0	0	0	0	0	3	0	0	0	0	0	0	0	0	0	0
PBANKA_141550	USP39	U4/U6.U5 tri-snRNP-associated protein 2, putative (USP39)	0	0	0	0	0	0	3	0	0	0	0	0	0	0	0	0	0	0
PBANKA_142700		protein phosphatase, putative	0	0	0	0	0	0	0	0	0	3	0	0	0	0	0	0	0	0
PBANKA_143940	ASF1	histone chaperone ASF1, putative (ASF1)	0	3	0	0	0	0	0	0	0	0	0	0	0	0	0	0	0	0
PBANKA_144160	ATX3	ataxin-3, putative (ATX3)	0	0	0	0	0	0	0	0	0	0	0	0	0	0	0	0	0	3
PBANKA_144330		merozoite surface protein 9, putative	0	0	0	0	0	0	0	0	0	0	0	0	0	0	0	0	0	3
PBANKA_145040		conserved Plasmodium protein, unknown function	0	0	0	0	0	0	3	0	0	0	0	0	0	0	0	0	0	0
PBANKA_145280		cell cycle control protein, putative	0	0	0	0	0	0	0	0	3	0	0	0	0	0	0	0	0	0
PBANKA_010240		conserved Plasmodium protein, unknown function	0	2	0	0	0	0	0	0	0	0	0	0	0	0	0	0	0	0
PBANKA_010470		long chain polyunsaturated fatty acid elongation enzyme, putative	0	0	0	0	0	0	0	0	0	0	0	0	0	0	0	0	0	2
PBANKA_020180		TatD-like deoxyribonuclease, putative	0	0	0	0	0	0	0	0	0	0	0	0	0	0	0	0	0	2
PBANKA_020920	PIESP15	parasite-infected erythrocyte surface protein (PIESP15)	0	0	0	0	0	0	0	0	0	0	0	0	0	0	0	0	0	2
PBANKA_040190		DNA-directed RNA polymerase subunit I, putative	0	2	0	0	0	0	0	0	0	0	0	0	0	0	0	0	0	0
PBANKA_040230	BCKDH-E2	lipoamide acyltransferase component of branched-chain alpha-keto acid dehydrogenase complex, putative (BCKDH-E2)	0	0	0	0	0	0	0	0	0	0	0	0	0	0	0	0	0	2
PBANKA_041030	RPN12	26S proteasome regulatory subunit RPN12, putative (RPN12)	0	0	0	0	0	0	0	0	0	0	0	0	0	0	0	0	0	2
PBANKA_051270		conserved Plasmodium protein, unknown function	0	0	0	0	0	0	0	0	0	0	0	0	0	0	0	0	0	2
PBANKA_051520	MORN1	MORN repeat-containing protein 1, putative (MORN1)	0	0	0	0	0	0	0	0	0	0	0	0	0	0	0	0	0	2
PBANKA_060110		mitochondrial phosphate carrier protein, putative	0	0	0	0	0	0	0	0	0	0	0	0	0	0	0	0	0	2
PBANKA_060290		conserved Plasmodium protein, unknown function	0	0	0	0	0	2	0	0	0	0	0	0	0	0	0	0	0	0
PBANKA_062220		conserved Plasmodium protein, unknown function	0	0	2	0	0	0	0	0	0	0	0	0	0	0	0	0	0	0
PBANKA_071700		ATPase, putative	0	0	0	0	0	0	0	0	0	0	0	2	0	0	0	0	0	0
PBANKA_071910		conserved Plasmodium protein, unknown function	0	0	0	0	0	0	0	0	0	0	0	0	0	0	0	0	0	2
PBANKA_080340		40S ribosomal protein S29, putative	0	0	0	0	0	0	0	0	0	0	0	0	0	0	0	0	0	2
PBANKA_080820		proteasome subunit alpha type-3, putative	0	0	0	0	0	0	0	0	0	0	0	2	0	0	0	0	0	0
PBANKA_081390	RPN8	26S proteasome regulatory subunit RPN8, putative (RPN8)	0	2	0	0	0	0	0	0	0	0	0	0	0	0	0	0	0	0
PBANKA_082250		conserved Plasmodium protein, unknown function	0	2	0	0	0	0	0	0	0	0	0	0	0	0	0	0	0	0
PBANKA_090410	RAB6	ras-related protein Rab-6, putative (RAB6)	0	0	0	0	0	0	0	0	0	0	0	0	0	0	0	0	0	2
PBANKA_090630		methyltransferase, putative	0	0	0	0	0	0	0	0	0	0	0	0	0	0	0	0	0	2
PBANKA_091830		transporter, putative	0	0	0	0	0	0	0	0	0	0	0	0	0	0	0	0	0	2
PBANKA_092030		conserved Plasmodium protein, unknown function	0	0	0	2	0	0	0	0	0	0	0	0	0	0	0	0	0	0
PBANKA_092880	U2AF1	splicing factor U2AF small subunit, putative (U2AF1)	0	2	0	0	0	0	0	0	0	0	0	0	0	0	0	0	0	0
PBANKA_093020	MLH	DNA mismatch repair protein MLH, putative (MLH)	0	0	0	0	0	2	0	0	0	0	0	0	0	0	0	0	0	0
PBANKA_093220		peptidyl-prolyl cis-trans isomerase, putative	0	0	0	0	0	0	0	0	0	0	0	0	0	0	0	0	0	2
PBANKA_093500		conserved Plasmodium protein, unknown function	0	2	0	0	0	0	0	0	0	0	0	0	0	0	0	0	0	0
PBANKA_101420		conserved Plasmodium protein, unknown function	0	2	0	0	0	0	0	0	0	0	0	0	0	0	0	0	0	0
PBANKA_102770	UDG	uracil-DNA glycosylase, putative (UDG)	0	0	2	0	0	0	0	0	0	0	0	0	0	0	0	0	0	0
PBANKA_110420	BCKDHB	2-oxoisovalerate dehydrogenase subunit beta, mitochondrial, putative (BCKDHB)	0	0	0	0	0	0	0	0	0	0	0	0	0	0	0	0	0	2
PBANKA_110860		SNAP protein, putative	0	2	0	0	0	0	0	0	0	0	0	0	0	0	0	0	0	0
PBANKA_112780		DnaJ protein, putative	0	0	0	0	0	0	0	0	0	0	0	2	0	0	0	0	0	0
PBANKA_113040		proteasome subunit alpha type-4, putative	0	0	0	0	0	0	0	0	0	0	0	0	0	0	2	0	0	0
PBANKA_114290	SKP1	suppressor of kinetochore protein 1, putative (SKP1)	0	0	0	0	0	0	0	0	0	0	0	0	0	0	0	0	0	2
PBANKA_120980		proteasome subunit beta type-5, putative	0	2	0	0	0	0	0	0	0	0	0	0	0	0	0	0	0	0
PBANKA_121130	ATG18	autophagy-related protein 18, putative (ATG18)	0	0	0	0	0	0	0	0	0	0	0	0	0	0	0	0	0	2
PBANKA_122030		lysophospholipase, putative	0	0	0	0	0	0	0	0	0	0	0	0	0	0	0	0	0	2
PBANKA_130300		DEAD/DEAH helicase, putative	0	2	0	0	0	0	0	0	0	0	0	0	0	0	0	0	0	0
PBANKA_132570	TLP1	thioredoxin-like protein (TLP1)	0	0	0	0	0	0	0	0	0	0	0	0	0	0	0	0	0	2
PBANKA_134000		dihydrofolate synthase/folylpolyglutamate synthase, putative	0	2	0	0	0	0	0	0	0	0	0	0	0	0	0	0	0	0
PBANKA_134330		proteasome subunit beta type-7, putative	0	0	0	0	0	0	0	0	0	0	0	0	0	0	0	0	0	2
PBANKA_134390		conserved Plasmodium protein, unknown function	0	0	0	0	0	0	0	0	0	0	0	0	0	0	2	0	0	0
PBANKA_135780		conserved Plasmodium protein, unknown function	0	2	0	0	0	0	0	0	0	0	0	0	0	0	0	0	0	0
PBANKA_136010	NT1	nucleoside transporter 1 (NT1)	0	0	0	0	0	0	0	0	0	0	0	0	0	0	0	0	0	2
PBANKA_142490		ubiquitin-conjugating enzyme, putative	0	0	0	0	0	0	0	0	0	0	0	0	0	0	0	0	0	2
PBANKA_143190		glycerol-3-phosphate dehydrogenase, putative	0	2	0	0	0	0	0	0	0	0	0	0	0	0	0	0	0	0
PBANKA_144700		cytochrome b5, putative	0	0	0	0	0	0	0	0	0	0	0	0	0	0	2	0	0	0
PBANKA_145420		conserved Plasmodium protein, unknown function	0	0	0	2	0	0	0	0	0	0	0	0	0	0	0	0	0	0
PBANKA_146050	GAK	serine/threonine protein kinase, putative	0	0	0	0	0	2	0	0	0	0	0	0	0	0	0	0	0	0
